1 **Phylogenetic reclassification of vertebrate melatonin receptors to include**

2 **Mel1d**

3

4 Elsa Denker <sup>\*</sup>, Lars O. E. Ebbesson <sup>\*</sup>, David G. Hazlerigg <sup>†</sup>, Daniel J. Macqueen <sup>‡</sup>

5

6 *\* NORCE Environment, NORCE Norwegian Research Centre, 5008 Bergen, Norway*

7 *† Department of Arctic and Marine Biology, UiT: the Arctic University of Norway,*

8 *9037 Tromsø, Norway*

9 *‡ The Roslin Institute and Royal (Dick) School of Veterinary Studies, The University*

10 *of Edinburgh, EH25 9RG Edinburgh, United Kingdom*

11

12

13

14 **Running title:** Mel1d - a new vertebrate melatonin receptor

15

16 **Keywords:** Melatonin receptor; Mel1d; vertebrate evolution; phylogenetic analysis;  
17 comparative genomics; conserved synteny; teleost fish

18

19 **Corresponding authors:**

20 Daniel J. Macqueen, The Roslin Institute, University of Edinburgh, Easter Bush

21 Campus, Midlothian, EH25 9RG, United Kingdom. Phone: (+44) 131 651 9249.

22 Email: [daniel.macqueen@roslin.ed.ac.uk](mailto:daniel.macqueen@roslin.ed.ac.uk)

23

24 Elsa Denker, Integrative Fish Biology Group, NORCE Environment, NORCE

25 Norwegian Research Center, Thormøhlensgate 55, 5008 Bergen, Norway. Phone:

26 (+47) 55 58 44 16. Email: [elde@norceresearch.no](mailto:elde@norceresearch.no)

27

28

29

## ABSTRACT

30

31 The circadian and seasonal actions of melatonin are mediated by high affinity G-  
32 protein coupled receptors (melatonin receptors, MTRs), classified into  
33 phylogenetically distinct subtypes based on sequence divergence and  
34 pharmacological characteristics. Three vertebrate MTR subtypes are currently  
35 described: MT1 (MTNR1A), MT2 (MTNR1B), and Mel1c (MTNR1C / GPR50), which  
36 exhibit distinct affinities, tissue distributions and signaling properties. We present  
37 phylogenetic and comparative genomic analyses supporting a revised classification  
38 of the vertebrate MTR family. We demonstrate four ancestral vertebrate MTRs,  
39 including a novel molecule hereafter named Mel1d. We reconstructed the evolution  
40 of each vertebrate MTR, detailing genetic losses in addition to gains resulting from  
41 whole genome duplication events in teleost fishes. We show that Mel1d was lost  
42 separately in mammals and birds and has been previously mistaken for an MT1  
43 paralogue. The genetic and functional diversity of vertebrate MTRs is more complex  
44 than appreciated, with implications for our understanding of melatonin actions in  
45 different taxa. The significance of our findings, including the existence of Mel1d, are  
46 discussed in an evolutionary and functional context accommodating a robust  
47 phylogenetic assignment of MTR gene family structure.

48

49

50

## INTRODUCTION

51

52 Melatonin is an ancient eukaryotic signalling molecule that regulates diverse  
53 biological functions. While best known as a regulator of biological rhythms in  
54 humans, this hormone also regulates energy balance, temperature, behavior, blood  
55 pressure, and seasonal reproduction. Melatonin is secreted by the pineal gland and  
56 targets the brain as well as peripheral tissues (**Hardeland et al. 2011, Slominski et**  
57 **al. 2012**), but is also produced by several tissues, eliciting paracrine effects (**Weaver**  
58 **and Reppert 1990**). The actions of melatonin depend on the spatiotemporal  
59 expression of high-affinity melatonin receptors (MTR), representing a specific class of  
60 G protein-coupled receptor (GPCR).

61

62 Three paralogous MTR family members have been characterized in jawed  
63 vertebrates, namely MT1 (Mel1a / MTNR1A), MT2 (Mel1b / MTNR1B), and Mel1c  
64 (MTNR1C / GPR50 in mammals) (**Reppert et al. 1994, 1995a, 1995b**). Despite  
65 showing overlap in expression, these different MTRs have evolved unique functions.  
66 MT1 has a higher affinity for melatonin than MT2 (**Dubocovich and Markowska**  
67 **2005**), and in mammals, Mel1c has lost the ability to bind melatonin (**Dufourny et al.**  
68 **2008**), though it does modulate melatonin signaling via its association with MT1  
69 (**Levoye et al. 2006**). While MT1 associates with a range of G proteins to activate  
70 several distinct signalling pathways, eliciting wide-ranging cellular effects (**Witt-**  
71 **Enderby et al. 2003**), MT2 associates with a single G protein (**Jockers et al. 2008**).  
72 Owing to such functional divergence, different MTRs may have very distinct  
73 biological effects, even when expressed in the same cell types (e.g. **Dubocovich**  
74 **and Markowska 2005**).

75

76 A past study demonstrated melatonin binding in the brain of jawed vertebrates and  
77 lamprey, but not in hagfishes or amphioxus (**Vernadakis et al. 1998**). Thus, it is likely  
78 that high-affinity MTRs were present in the vertebrate ancestor, and were secondarily  
79 lost in some jawless fishes, as noted for several other traits (e.g. reduction of  
80 vertebrae-like elements - **Ota et al. 2011**; *Dlx* genes - **Sugahara et al. 2013**;  
81 reviewed in Kuraku **2013**). MTR-like GPCR genes have also been discovered in  
82 urochordates, cephalochordates, hemichordates and echinoderms (**Kamesh et al.**  
83 **2008**, **Nordstrom et al. 2008**, **Krishnan et al. 2013**), but their evolutionary affinity to  
84 the vertebrate MTRs remains ambiguous. The distinct MTRs of jawed vertebrates  
85 potentially originated during two rounds (2R) of whole genome duplication (WGD) at  
86 the stem of vertebrate evolution (e.g. **Dehal and Boore, 2005**), though this is yet to  
87 be established. Additional expansions in the MTR family of fishes (e.g. **Shang &**  
88 **Zhdanova 2007**; **Hong et al. 2014**) may owe to a further round of teleost-specific  
89 WGD ('Ts3R') in the common teleost ancestor, or additional lineage-specific WGD  
90 events in some lineages, e.g. the salmonid-specific 4R ('Ss4R') (**Macqueen and**  
91 **Johnston, 2014**; **Lien et al. 2016**), though, again, this has not been properly  
92 explored.

93

94 The overarching goal of this study was to re-examine the evolutionary history of  
95 vertebrate MTRs, using data in publically-available sequence databases for robust  
96 phylogenetic and comparative genomic reconstructions. Our findings concretely  
97 demonstrate a fourth ancestral MTR ('Mel1d'), along with teleost-specific expansions  
98 in MTR diversity, likely owing to Ts3R and Ss4R. With a new evolutionary framework  
99 in place we reinterpret findings on vertebrate MTR sequence divergence and

100 expression from past studies. Overall, this study highlights substantial unexplored  
101 diversity in MTR signalling within vertebrates, pointing to new lines of investigation.

102

103

## MATERIAL AND METHODS

104

### 105 **Sequence and phylogenetic analyses**

106 Amino acid sequences encoded by MTR or FAT protocadherin family member genes  
107 were collected from representative jawed vertebrate species with high-quality  
108 genome assemblies. Details of these sequences are given in **Table S1** (MTR) and  
109 **Table S2** (FAT), which include database accession numbers and nomenclature  
110 matching the findings of our phylogenetic analyses. As a start point for the analysis,  
111 MTR/FAT proteins of human (*i.e.* MT1/MT2/Mel1c/GPR50 or FAT1/2/3) were used as  
112 queries in BLASTp (**Altschul et al. 1997**) searches to identify homologues within the  
113 NCBI database (<https://www.ncbi.nlm.nih.gov/>). We also used the Ensembl genome  
114 browser (<https://www.ensembl.org/>) to collect MTR family proteins from several  
115 species, using the EnsemblCompara method (**Vilella et al. 2009**).

116

117 The sequences were aligned using MAFFT v.7 (**Katoh and Standley, 2013**) with  
118 default settings and subjected to quality filtering using GBlocks with default settings  
119 (**Talavera and Castresana, 2007**). Final alignments of 300 (MTR) and 2,540 (FAT)  
120 amino acid positions (Additional Dataset 1) were used for tree building, done using  
121 BY and ML (MTR) or just ML (FAT) methods. ML trees were generated using IQ-  
122 TREE (**Nguyen et al. 2015**) via the IQ-TREE webserver (**Trifinopoulos et al. 2016**),  
123 employing the best-fitting amino acid substitution model selected with ModelFinder  
124 (**Kalyaanamoorthy et al. 2017**) under the Bayesian information criterion. The best fit  
125 models were JTT+F+I+ G4 for MTR and JTT+G4+I for FAT, where 'JTT' is the

126 general matrix of **Jones et al. 1992**, '+I' includes empirical estimation of the  
127 proportion of invariant sites, '+F' includes empirical estimation of amino acid  
128 frequencies and '+G4' denotes estimation of the gamma distribution parameter with 4  
129 rate classes. The stability of branching in the ML trees was assessed using 1,000  
130 ultrafast bootstrap replicates, (**Hoang et al. 2018**). The BY analysis (MTR dataset)  
131 was done in BEAST v1.8.3 (**Drummond et al. 2012**), employing an uncorrelated  
132 relaxed clock model (**Drummond et al. 2005**) and a Yule speciation prior (**Gernhard,**  
133 **2008**), along with the best-fitting substitution model selected by IQ-TREE. A Markov  
134 chain Monte Carlo (MCMC) chain of 50 million generations was generated and  
135 sampled every 5,000 generations. Convergence of the MCMC chain was assessed  
136 using Tracer v1.7.1 (<http://beast.bio.ed.ac.uk/tracer>). A maximum clade credibility tree  
137 was generated in TreeAnnotator (**Drummond et al. 2012**) after removal of the first  
138 10% sampled trees.

139

#### 140 **Comparative genomic and sequence analyses**

141 Synteny analyses were performed using Ensembl genome browser annotations via  
142 the Genomicus platform (**Nguyen et al. 2018**). These analyses were supplemented  
143 with data from NCBI GenBank for species not available in Ensembl. Gene prediction  
144 and annotation for *Lethenteron camtschaticum* was performed using FGENESH  
145 (**Soloyev et al. 2006**). Comparative analyses of MTR family amino acid sequences  
146 was done using the final alignment described above (note: the Gblocks filtering step  
147 served to remove flanking regions outside the transmembrane/loop regions, which  
148 were unaltered). The sequence similarity of the proposed vestigial MTR-like  
149 pseudogenes identified in our synteny analyses was established using BLASTx  
150 within the NCBI database.

151

## 152 **Data Availability**

153 Supplemental material described in the paper is available at Figshare: XXX. Fig. S1.  
154 ML phylogenetic analysis of MTRs in vertebrates. This analysis was done using IQ-  
155 TREE with a high-confidence alignment of eighty MTRs (300 amino acid positions;  
156 Additional Dataset 1) and the best-fitting amino acid substitution model  
157 (JTT+F+I+G4). Numbers on branches are bootstrap support values. Other details as  
158 in the Fig. 1 legend (see main text) Table S1 provides details of all protein sequences  
159 used for phylogenetic analyses of the vertebrate MTR family. Table S2 provides  
160 details of all sequences used for phylogenetic analyses of the vertebrate FAT  
161 protocadherin family  
162 Additional Dataset 1 is the MTR sequence alignment used for phylogenetic analysis  
163 and comparative sequence analysis. Additional Dataset 2 is the FAT alignment used  
164 for phylogenetic analysis.

165

166

167

168

169

170

171

172

173

174

175

176

177



178

179

180

181

182

183

## RESULTS

184

### 185 **Four MTRs are retained in jawed vertebrates**

186 We identified eighty unique MTR family member proteins in sequence databases  
187 representing a standardized set of eighteen jawed vertebrate lineages (see  
188 MATERIALS AND METHODS). A Bayesian (BY) phylogenetic analysis was done  
189 ([Fig. 1](#)) incorporating a relaxed molecular clock model, which allows estimation of the  
190 most plausible root location in the tree ([Drummond \*et al.\* 2006](#); *e.g.* [Macqueen and](#)  
191 [Wilcox 2014](#); [Redmond \*et al.\* 2018](#)). Four distinct MTR clades ([Fig. 1](#)) had strong  
192 statistical support (posterior probability, PP: >0.96), and each was represented by  
193 cartilaginous fish, as well as ray-finned and lobe-finned fish lineages, with branching  
194 patterns closely matching expected species phylogeny ([Fig. 1](#)). Three of these  
195 clades correspond to known ancestral vertebrate MTR family members (*e.g.*  
196 [Dufourny \*et al.\* 2008](#)). The fourth clade is hereafter named 'Mel1d'. The same four  
197 clades were strongly supported in an unrooted maximum likelihood (ML)  
198 phylogenetic analysis (bootstrap support: >96%) congruent with the BY tree ([Fig.](#)  
199 [S1](#)).

200

201 These analyses indicate that four distinct MTRs existed in the jawed vertebrate  
202 ancestor. However, the phylogenetic affinity of the four MTRs remains equivocal in

203 the BY analysis, with moderate support for Mel1d/MT1 (PP: 0.87) and MT2/Mel1C  
204 (PP: 0.53) being paralogues, which can be explained parsimoniously by 2R (**Fig. 1**).

205

## 206 **Evolutionary history of individual vertebrate MTRs**

207 Expanding on the above findings, we reconstructed a more detailed evolutionary  
208 history for each ancestral MTR in jawed vertebrates, accommodating gene losses, in  
209 addition to gains resulting from WGD events in teleosts (summarized in **Fig. 2**).

210

211 Mel1d was encoded by a single gene in all represented species (**Fig. 1, Fig. 2a**)  
212 including teleosts, consistent with the loss of any paralogues created during Ts3R  
213 and Ss4R. In lobe-finned fish, Mel1d was identified in a coelacanth, an amphibian,  
214 and two reptiles, but was not identified in the mammals and birds represented in our  
215 trees (**Fig. 2a**). As only a small number of bird and mammals were included, we  
216 decided to search more broadly for Mel1d orthologues. Hence, BLAST searches of  
217 the complete set of proteins stored in NCBI for mammals (~4.6 million) and birds  
218 (~2.8 million) were done using reptile Mel1d orthologues as the query. Though  
219 hundreds of bird and mammal genomes are available in NCBI with protein-level  
220 annotations (spanning the diversity of each lineage), the top mammal/bird hit for  
221 reptile Mel1D was always MT1/MTNR1A (not shown). Considering our current  
222 understanding of amniote phylogeny (e.g. **Chiari et al. 2012**), our data requires that  
223 independent losses of Mel1d occurred in the ancestors to birds and mammals.

224

225 For all studied vertebrate species outside teleosts, we identified one copy of MT1,  
226 barring spotted gar, where MT1 was not identified (**Fig. 1, Fig. 2b**); its trace was  
227 retrieved in the genome after further analyses (see section below), representing a  
228 sequence annotated as a pseudogene. Several teleost species retain two or more

229 ancestral MT1 copies (PP: 0.99, **Fig. 1**), which can be explained by Ts3R. These  
230 duplicates have been annotated in zebrafish as “Mtnr1aa” and “Mtnr1ab” (**ZFIN** 2008  
231 - ZNC nomenclature, cloned as “ZMel1a1” and “ZMel1a3” by **Shang & Zhdanova**  
232 **2007**). Consequently, we maintained the same ‘a’ and ‘b’ nomenclature in all species  
233 according to inferences of orthology with zebrafish (**Fig. 1**). The two teleost-specific  
234 MT1 paralogues were not present in all teleost lineages, with MT1b absent from the  
235 studied acanthopterygians (tilapia and pufferfish). Salmonid-specific paralogues of  
236 MT1a (MT1a1 and 1a2) were identified, ancestral to three salmonid species (PP: 1.0,  
237 **Fig. 2b**), consistent with retention from Ss4R, though only a single copy of MT1b was  
238 retained in the same three species, suggesting ancestral loss following Ss4R (**Fig. 1**,  
239 **Fig. 2b**).

240

241 We identified one copy of MT2 in non-teleost vertebrate lineages, and evidence for  
242 teleost-specific paralogues (**Fig. 2c**). Two MT2 paralogues were identified in  
243 Ostariophysi members (zebrafish and Mexican cavefish) and northern pike  
244 (Protacanthopterygii); however, only one MT2 copy was identified in Acanthopterygii  
245 members (Nile tilapia and pufferfish) (**Fig. 1**, **Fig. 2c**). Branching patterns among  
246 these duplicates were not well resolved when considering species phylogeny. An  
247 ancestral teleost duplication event (e.g. Ts3R) predicts two paralogous MT2 teleost  
248 clades, each containing teleosts branching after expected species relationships (as  
249 seen for MT1a/b). However, a clade containing zebrafish “Mtnr1ba” (**ZFIN** 2008,  
250 “ZMel1b2” in **Shang & Zhdanova 2007**) branched outside other fish (including the  
251 non-teleost spotted gar) in both the BY and ML trees (**Fig. 1 and S1**). Internal to the  
252 spotted gar, there were two teleost MT2 clades, one containing zebrafish “Mtnr1bb”  
253 (**ZFIN** 2008, “ZMel1b1” in **Shang & Zhdanova 2007**) and other teleost lineages  
254 (northern pike and Acanthopterygii members), while the other contained a separate

255 northern pike sequence and all MT2 sequences from salmonids. Given the strong  
256 support for the clade containing zebrafish “Mtnr1bb” (PP:1.0, Bootstrap support:  
257 100%), we considered all sequences therein to be orthologous, and named them  
258 MT2b (to maintain the zebrafish “b” nomenclature) (Fig. 2c). We named the  
259 remaining teleost MT2 sequences as MT2a (Fig. 2c), under the hypothesis that  
260 orthology to zebrafish MT2a was obscured by a long-branch attraction artefact (note  
261 the long-branch length leading to Ostariophysi members for MT2a; Fig. S1). This  
262 scenario is parsimonious, as it allows for a single ancestral teleost duplication (e.g.  
263 Ts3R) rather than several lineage-specific MT2 gains. Accordingly, we propose that  
264 MT2a was lost in the ancestor to *Oreochromis* and *Takifugu*, while two salmonid  
265 duplicates of MT2a (MT2a1 and 2a2) were retained from Ss4R (Fig. 1 and S1, Fig.  
266 2c). No copies of MT2b were identified in salmonids, suggesting a loss in the  
267 common salmonid ancestor (Fig. 2c).

268  
269 As shown elsewhere (Dufourny *et al.* 2008), Mel1c and mammalian GPR50 proteins  
270 grouped together in a well-supported clade (Fig. 1). A single Mel1c copy was  
271 identified in all teleosts barring salmonids, which evidently lack Mel1c (Fig. 2d). This  
272 is consistent with a scenario where one Mel1c paralogue was lost early following  
273 Ts3R, and an additional loss occurred in the common salmonid ancestor (Fig. 2d).

274

### 275 **Synteny analysis supports phylogenetic assignment of vertebrate MTRs**

276 Next, to gain an independent line of evidence to support our phylogenetic  
277 reconstructions, we compared the genomic regions harboring MTR-encoding genes  
278 among a range of vertebrate lineages. The local gene neighborhood containing each  
279 MTR family member was more or less conserved across jawed vertebrate evolution,  
280 defining identifiable synteny groups specific to each ancestral MTR (Fig. 3), including

281 teleost and salmonid-specific paralogues (**Fig. 4**). The genomic neighborhood  
282 containing the single *MTR* locus of lampreys did not conserve synteny with an  
283 equivalent region containing any single *MTR* gene in gnathostomes. Instead, the  
284 genes surrounding the single *MTR* locus of lampreys showed notable similarity to a  
285 combination of genes located around the various gnathostome *MTR*s (**Fig. 4e**). This  
286 lends support to an ancestral origin of *MTR*s in the vertebrate lineage, but does not  
287 allow us to pinpoint the relationship of lamprey *MTR* to the four *MTR* family members  
288 of jawed vertebrates. One possible interpretation is that the duplications generating  
289 four gnathostome *MTR* genes occurred after the cyclostomes and gnathostomes  
290 split, with the lamprey genomic neighborhood reflecting a derived representation of  
291 the ancestral vertebrate state. However, the current consensus is that at least one  
292 round of WGD is shared by cyclostomes and gnathostomes (*e.g.* Kuraku *et al.* 2009,  
293 Stadler *et al.* 2004). In this scenario, conserved synteny between a single genomic  
294 region in the former to multiple blocks in the latter may be explained by one or more  
295 shared duplications followed by lineage-specific rediploidization, as proposed by  
296 **Robertson *et al.* 2017**.

297

### 298 **Genetic linkage between *MTR* and *FAT* genes**

299 Tandem-linked *MTR* and *FAT* protocadherin gene family members are strongly  
300 conserved in all vertebrates (**Fig. 3, Fig. 4**). Specifically, *MT1*, *Mel1d*, and *MT2* were  
301 almost always in tandem with *FAT1*, 2, and 3, respectively (**Fig. 3, Fig. 4**). This  
302 association was absent for *Mel1c*, in addition to *MTR* co-orthologues from a sea  
303 squirt (**Fig. 3f**) and the Florida lancelet (not shown), defining this as a vertebrate-  
304 specific feature. Past studies have noted genetic linkage between *MTR* and *FAT*  
305 genes. For example, the *FAT3-MT2* locus is involved in diabetes risk, with several  
306 SNPs involved in disease located between the two genes, implying potential

307 functional links (e.g. **Prokopenko et al. 2009, Dupuis et al. 2010**). While, the reason  
308 for co-evolution of these loci is yet to be determined, the tandem organization of FAT  
309 and MTR genes indicates selective pressure to maintain an association that may be  
310 underpinned by a conserved feature of vertebrate physiology.

311

312 FAT family sequences also provide an independent source of phylogenetic  
313 information that may help reconstruct the evolution of the genomic regions containing  
314 linked MTR genes. In an ML analysis performed with FAT proteins from  
315 representative vertebrate species, we observed three clades (FAT1, 2 and 3) that  
316 branched according to expected species relationships (**Fig. 5**). When the ML tree  
317 was midpoint rooted, FAT1 (linked to MT1) and FAT2 (linked to Mel1d) were sister  
318 groups (**Fig. 5**), consistent with the sister relationship of MT1 and Mel1d recovered  
319 by the MTR phylogeny. Further, the teleost duplications observed for MTR genes  
320 were clearly identifiable in the respective tandem FAT genes (**Fig. 5**). Finally, the  
321 well-supported branching of salmonid FAT3a sequences with zebrafish FAT3a (i.e.  
322 linked to the *MT2a* gene, **Fig 3c**) adds weight to the hypothesis that salmonid/pike  
323 MT2 sequences are orthologous to zebrafish *MT2a* (**Fig. 2c**).

324

### 325 **Synteny analyses support MTR losses**

326 The conservation of synteny across vertebrate taxa in genomic regions containing  
327 MTR genes provides useful information on MTR genes inferred to be absent in  
328 sequence databases. In this respect, we observed that the genomic regions  
329 containing *Mel1d* in reptiles, frogs and fishes have matched syntenic regions in the  
330 human and chicken genomes (**Fig. 3d**). Consequently, the regions predicted to  
331 contain *Mel1d* in human and chicken have been properly assembled and are  
332 otherwise well annotated, consistent with *bone-fide* genetic losses of *Mel1d* in these

333 species. The same approach allowed us to detect a pseudogene likely to be a  
334 vestige of *Mel1c* in Atlantic salmon (LOC106568030) (**Fig. 3d**), and a gene  
335 annotated as 'non-coding' bearing similarity with *MT1* (according to BLAST) at the  
336 predicted *MT1* locus in spotted gar (LOC107077181) (**Fig. 3a**). Further, a second  
337 *FAT2* paralogue was detected in Atlantic salmon, supporting our previous conclusion  
338 of an ancestral loss of one *Mel1d* copy following Ss4R. Similarly, a second *FAT3*  
339 paralogue was detected in *Oreochromis*, non-paired with an *MTR2* gene (**Fig. 3c**),  
340 confirming the loss of *MT2a* in this species.

341

### 342 **Comparative sequence analysis of *Mel1d* with other MTRs**

343 Having established that *Mel1d* is an ancestral vertebrate MTR, we sought to compare  
344 the primary amino acid sequence of this molecule to other MTR family members,  
345 hoping to gain clues on its function considering existing literature (**Fig. 6**).

346

347 We first examined the MTR transmembrane domains and ligand-binding residues,  
348 which have known functional importance. The characteristic seven transmembrane  
349 domain structure (TMDs) of all MTRs, critical for GPCR structure and ligand binding  
350 (**Baldwin 1994**), were conserved in *Mel1d*, *MT1*, *MT2* and *Mel1c* (**Fig. 6**). Indeed,  
351 most of the residues identified as key for melatonin binding are readily identifiable in  
352 the *Mel1d* transmembrane domains (**Fig. 6**), in particular TM3, 6 and 7 (**Gubitz &**  
353 **Reppert 2000, Kokkola et al. 2003, Mazna et al. 2005, 2008, Chan & Wong 2013**).

354 The only notable difference in the TMDs was that several *Mel1d* orthologues had  
355 threonine replacements at position 254, specific to this MTR. This position is  
356 important for melatonin binding in *MT2* (valine-291 on human *MT2*), which was not  
357 reported for *MT1* (**Mazna et al. 2005**). Outside the TMDs, two additional melatonin  
358 binding residues (asparagine-102 of the conserved NRY motif and alanine-238) were

359 conserved in Mel1d (**Fig. 6**). Interestingly, a mutation in the second extracellular loop  
360 of GPR50 linked to the loss of melatonin binding function in mammals (**Clément et**  
361 **al. 2017**) was absent in Mel1d (**Fig. 6**).

362

363 Other key sites conserved in Mel1d included cysteine-78 and cysteine-155,  
364 responsible for a conserved disulfide bridge essential to MTR structure (**Fig. 6**). In  
365 addition, residues important for G protein activation and trafficking of MT1 (**Kokkola**  
366 **et al. 2005**) were all conserved in Mel1d (green arrows on **Fig. 6**). Putative  
367 palmitoylation site in MT1 and MT2 (cysteine-314 in MT1 and cysteine- 332 in MT2,  
368 **Sethi et al. 2008**) required for G-protein interaction (light blue arrow on **Fig. 6**) were  
369 either not identified (MT2 cysteine-332) in Mel1d or absent from most species (MT1  
370 cysteine-314). However a proximal conserved cysteine in position 294 of Mel1d (**Fig.**  
371 **6**) may fulfil a similar function. Several phosphorylation sites have been suggested in  
372 the C-terminal cytoplasmic tail of MT1 and MT2, which might be important for  $\beta$ -  
373 arrestin-dependent receptor internalization (**Ebisawa et al. 1994, Sethi et al. 2008,**  
374 yellow arrows on **Fig. 6**). One of these sites is present on Mel1d, at position 288,  
375 however only in coelacanth and tetrapods. None of the other phosphorylation sites  
376 are present because of the shorter length of Mel1d, and this could be linked to  
377 differences in phosphorylation properties.

378

### 379 **Residue changes distinguishing Mel1d from other MTRs**

380

381 The above analyses confirm that Mel1d has most of the canonical residues for  
382 melatonin binding and MTR structure/function. We next sought to identify conserved  
383 differences between Mel1d and the other MTRs, as candidates to impart functional  
384 properties unique to Mel1d.



385

386 Five extracellular or intracellular positions in Mel1d show substantial differences with  
387 either one or all other MTRs (**Fig. 6**). In most Mel1d orthologues, the first  
388 extracellular loop contains lysine (positive charged) at position 38, which is typically  
389 asparagine (neutrally charged) in the other MTRs. At position 144, which is almost  
390 always fixed as glycine in MT1, MT2 and Mel1c, Mel1d orthologues retain glutamic  
391 acid or aspartic acid. This replacement is presumed functionally significant, as  
392 glycine provides high conformational flexibility (**Betts and Russell 2003**), while  
393 glutamic and aspartic acid are highly negatively charged. At position 246, MTRs  
394 usually conserve proline (except for the two derived GPR50 from mammals), but  
395 Mel1d shows a high diversity of residues with diverse functional properties,  
396 suggesting a distinct mode of selective pressure. In the same loop (position 242), a  
397 gap is observed in all Mel1d sequences at an amino acid position that is variable  
398 among the other MTRs. Finally, a notable difference between Mel1d and MT1 is  
399 observed in position 119, in the second intracellular loop. Most MT1 sequences have  
400 aspartic acid at this position, while Mel1d conserves asparagine or serine, leading to  
401 a major difference in charge.

402

403

404

405

406

407

408

409

410

411

412

413

414

415

416

417

418

419

420

## DISCUSSION

421

422 Our unequivocal demonstration of a new ancestral vertebrate MTR forces a revision  
423 of current models for the origin and diversity of MTRs, and has biological implications  
424 for vertebrate lineages conserving distinct MTR gene repertoires.

425

426 It seems important to ask why Mel1d has previously been missed as a unique MTR,  
427 when the gene is readily detectable in sequence databases. This is likely partly due  
428 to a historic assumption that the MTR gene family structure of birds and mammals  
429 (i.e. MT1, MT2 and Mel1c) is representative for all vertebrates. Mel1d has high  
430 similarity with MT1, and has tended to be named 'mntnr1a-like' in genome databases.

431 In addition, previous phylogenetic studies of MTRs have been based on small  
432 datasets (e.g. **Reppert et al. 1995a**; **Mazurais et al. 1999**; **Park et al. 2006**,  
433 **2007a,b**; **Shang & Zhdanova 2007**; **Hong et al. 2014**), with biases in the taxa  
434 sampled, and could not by design distinguish Mel1d and MT1. A single past study  
435 noted a *Xenopus* MTR sequence that did not group with MT1, MT2 or Mel1c and  
436 concluded the existence of a novel MTR (Mel1d) (**Shiu et al. 1996**); correctly

437 according to our findings. Our study benefits from a much broader survey of  
438 vertebrate MTR sequences, allowing us to conclude that Mel1d is at least 450 million  
439 years old, having been present in the jawed vertebrate ancestor.

440

441 Our phylogenetic reconstruction of MTRs will help the field going forwards, as  
442 researchers can be certain of which family member (including teleost-specific  
443 paralogues) they are studying, allowing more reliable conclusions in comparative  
444 studies of function and gene expression. We show that teleost-specific paralogues of  
445 MT1 are easily distinguished from Mel1d and provide a scheme to allow researchers  
446 to match teleost MTRs formerly named under several nomenclature systems to a  
447 single phylogenetically-assigned naming system accommodating orthologues and  
448 paralogues ([Table 1](#)).

449

#### 450 **Insights into Mel1d function: reinterpreting expression data in teleosts**

451 While not being previously recognized as a unique vertebrate MTR, Mel1d has  
452 already been studied in various teleosts ([Table 1](#)). These past studies demonstrate  
453 that the *Mel1d* transcript is abundantly expressed in a manner like other MTR family  
454 members, but showing differences that may underlie unique functions. A pattern  
455 seems conserved across multiple species, where Mel1d and MT1a expression is  
456 higher in brain and retina, respectively (e.g. **Park et al. 2006, 2007a,b; Ikegami et**  
457 **al. 2009; Confente et al. 2010; Hong et al. 2014**). Mel1d tends to be more strongly  
458 expressed in brain regions associated with visual perception (e.g. **Mazurais et al.**  
459 **1999; Gaildrat and Falcón, 2000; Shi et al. 2004; Confente et al. 2010; Hong et**  
460 **al. 2014**). Many peripheral tissues were reported to express Mel1d with species-  
461 specific differences and in a distinct manner to other MTRs (**Park et al. 2006,**  
462 **2007a,b; Ikegami et al. 2009; Confente et al. 2010; Hong et al. 2014**). Such data

463 suggests involvement of Mel1d in photoreceptive processes, along with broader  
464 regulatory roles in the physiological functions of peripheral organs.

465

466 Rhythmical oscillations in the expression of Mel1d have also been reported, with  
467 variations depending on species, organ and season. In zebrafish, a day/night  
468 oscillation of MTR brain gene expression (peaking at night) was noted for all six MTR  
469 paralogues, including Mel1d, with further expression upregulation in response to  
470 melatonin administration (**Shang & Zhdanova 2007**). In golden rabbitfish, MT1a,  
471 Mel1d and Mel1c expression was higher at night for brain and retina, with Mel1d  
472 levels peaking at different times (**Park et al. 2006, 2007a,b, 2014**). In goldfish, Mel1d  
473 was the only MTR showing rhythmical oscillations in optic tectum expression, while  
474 the same was true for MT1a in retina, both peaking at the night-day transition  
475 (**Ikegami et al. 2008**). In a marine pufferfish, Mel1d, MT1a and Mel1c showed  
476 synchronous daily cycling of expression in the pineal gland with a nocturnal peak  
477 (**Ikegami et al. 2015**). Conversely, in golden rabbitfish pineal gland, oscillations were  
478 desynchronized for the same three MTRs (**Park et al. 2006, 2007a,b**). Daily  
479 rhythmicity in Mel1d expression has also been observed in peripheral tissues (liver  
480 and kidney) of golden rabbitfish, with higher expression during the day, opposite to  
481 the brain/retina (**Park et al. 2006, 2007b**). In addition to daily variation in regulation,  
482 Mel1d expression is regulated by other cycles, for example showing semilunar  
483 oscillation in the diencephalon of mudskipper (**Hong et al. 2014**) and ultradiurnal  
484 oscillation in a marine pufferfish, which may be circatidal (**Ikegami et al. 2015**).  
485 Mel1d expression in the Senegalese sole exhibited stronger day-to-night and  
486 seasonal variation than other MTR family members, with reciprocal differences  
487 recorded between retina and optic tectum (**Confente et al. 2010**). Therefore, past

488 work shows that Mel1d is regulated during multiple biological cycles in teleosts,  
489 showing variations distinct from other MTRs, implying functional distinctiveness.

490

#### 491 **Functional divergence between Mel1d and MT1?**

492 High protein-level similarity between Mel1d and MT1, taken with the conservation of  
493 all key residues in the MTR transmembrane domains, strongly implies that Mel1d  
494 binds melatonin. Notably, residues showing conserved replacements between Mel1d  
495 and MT1 are all located in extracellular or cytoplasmic loops, which is predicted to  
496 impact interactions with other proteins, in particular signalling partners, rather than  
497 melatonin. Strikingly, one of these sites corresponds to a documented human MT1  
498 mutation studied *in vitro* (**Chaste et al. 2010**). The replacement of glycine-144 (MT1)  
499 with glutamic acid or aspartic acid corresponds to a G166E mutation in human MT1,  
500 associated with impaired activation of cAMP signalling, despite retention of strong  
501 melatonin binding (**Chaste et al. 2010**). The elephant shark retains glutamic acid at  
502 this position in both MT1 and Mel1d, suggesting this represents the ancestral state,  
503 with functional divergence arising in the common ancestor to lobe and ray-finned  
504 fishes. It is also intriguing to observe that Mel1d of two tetrapods have apparently  
505 reverted to glycine in this position, indicating selection towards the ancestral residue.

506

#### 507 **Why was Mel1d lost in mammals and birds?**

508 Further work will be needed to establish the extent of conservation in Mel1d function  
509 and regulation across different vertebrate lineages. This should focus on reptiles and  
510 amphibians, where the function of this gene has not been studied experimentally.  
511 Such studies may help explain the specific biological requirements for Mel1d, and  
512 reveal why the gene was lost independently in mammals and birds. It is notable that  
513 mammals and birds stand out from other vertebrates when considering their

514 melatonin-dependent light detection and clock systems. Mammals have lost  
515 extraocular light perception and relocated control of their biological clock away from  
516 melatonin-producing pinealocytes to the suprachiasmatic nucleus (**Falcón *et al.***  
517 **2009**). Birds have both the ancestral pineal clock and melatonin production system,  
518 but also independently developed a clock system in the homologue of the  
519 suprachiasmatic nucleus and use retinal detection (**Cassone 1991, Falcón *et al.***  
520 **2009**). Another distinguishing feature specific to both groups is homeothermy, with  
521 modulatory effects of melatonin on body temperature regulation reported in humans  
522 (**Cagnacci *et al.* 1992; Viswanathan *et al.* 1990**) and Japanese quail (**Underwood**  
523 **and Edmonds 1995**). Extrinsic temperature variation appears a less important  
524 zeitgeber for the circadian clock of homeotherms relative to poikilotherms (**Rensing**  
525 **and Ruoff, 2002**), which are known to use melatonin to regulate behavioral  
526 thermoregulation (**Lutterschmidt *et al.* 2003**). In addition, birds and mammals are  
527 the only vertebrates that have evolved (through convergent mechanisms)  
528 stereotypical slow wave and rapid eye movement sleep phases, linked to melatonin  
529 regulation in mammals (**Lesku *et al.* 2011**). Such changes in the physiological role of  
530 melatonin and consequent re-organization of melatonin response pathways, may  
531 have been the ultimate driver for Mel1d redundancy and gene loss through relaxation  
532 of purifying selection.

533

534 Another melatonin-associated function that is present in vertebrate lineages retaining  
535 Mel1d (in addition to lamprey), but lost in both mammals and birds, is the negative  
536 regulation of pigmentation development in the dark, known as the “body-blanching  
537 response” (**Hamasaki and Eder 1977, Norris and Carr 2013**). In fishes, melatonin is  
538 thought to regulate chromatosome aggregation in different kinds of chromatophores  
539 (**Fujii 2000**); Mel1d is expressed in the skin of mudskipper (together with MT1 -

540 **Hong et al. 2014**), the goldfish (together with MT2 and Mel1c - **Ikegami et al. 2008**)  
541 and the sole (together with MT2 - **Confente et al. 2010**). In addition, in sole skin,  
542 Mel1d is the only MTR to be up-regulated at night. It is therefore possible that Mel1d  
543 is involved in skin physiology and pigment regulation in fish chromatophores.

544

#### 545 **Expansion of the MTR repertoire of teleosts**

546 Contrary to mammals/birds, there has been a trend towards evolutionary expansion  
547 in the MTR repertoire of teleosts, as observed in many gene families with paralogues  
548 retained from Ts3R (**Glasauer and Neuhauss, 2014**) and Ss4R (**Houston and**  
549 **Macqueen, 2019**). Interestingly, not all MTR family members were affected equally.  
550 While we identified multiple paralogous copies of MT1 and MT2 - presumed to have  
551 been retained from Ts3R and Ss4R - Mel1c and Mel1d were always single copy,  
552 requiring repeated losses of paralogues generated during gene duplication or WGD  
553 events. This is compatible with a hypothesis where the functions or expression-level  
554 regulation of MT1 and MT2 can be divided among paralogous copies, following the  
555 well-established subfunctionalization model, or potentially reflects fixation of new  
556 adaptive functions among MT1/MT2 paralogues (**Stoltzfus 1999 and Force et al.**  
557 **1999**). In this respect, we observed several amino acid substitutions between MT1a  
558 vs. MT1b and MT2a vs. MT2b (**Fig. 6**), consistent with protein-level functional  
559 divergence. Conversely, selection has operated in a distinct manner for Mel1c and  
560 Mel1d, with any duplicates generated being quickly purged by selection for reasons  
561 that remain to be established, but potentially linked to dosage constraints, or a  
562 mechanism of regulation that cannot be divided across distinct loci.

563

#### 564 **Conclusions**

565 Mel1d is one of four ancestral vertebrate MTRs that shows a wide phylogenetic  
566 distribution and has both conserved and divergent functional characteristics  
567 compared to MT1, MT2 and Mel1c, including at the protein-sequence level and in  
568 terms of expression linked to chronobiological traits. Additional work is needed to  
569 characterize the functional distinctiveness of Mel1d compared to other MTRs and to  
570 explain why unique MTR repertoires have been conserved in different vertebrate  
571 lineages.



572

573 **Conflict of interest:** The authors declare no conflict of interest.

574

575 **Author contributions:** The study was initiated by DH, LOEE and DJM. Sequence  
576 collection, alignment and phylogenetic analyses was done by DJM. Comparative  
577 genomic and sequence analyses were done by ED. The manuscript was written by  
578 ED and DJM, with contributions from DH and LOEE.

579

580 **Funding information:** This work was funded by the Frimedbio (Fri prosjektstøtte for  
581 medisin, helse og biologi) program of the Research Council of Norway (grant number  
582 241016 - "Light & Salt - Thyroid hormone deiodinase paralogues & the evolution of  
583 complex life-history strategy in salmonids"). DJM was supported from BBSRC  
584 Institute Strategic Programme funding to The Roslin Institute (grant ref:  
585 BBS/E/D/10002071).

586

587  
588  
589  
590  
591  
592  
593  
594  
595  
596  
597  
598  
599  
600  
601  
602  
603  
604  
605  
606  
607  
608  
609  
610  
611  
612

## REFERENCES

- Altschul SF, Madden TL, Schäffer AA, Zhang J, Zhang Z, Miller W, Lipman DJ. Gapped BLAST and PSI-BLAST: a new generation of protein database search programs. *Nucleic Acids Res.* 1997;25(17):3389–402.
- Baldwin JM. Structure and function of receptors coupled to G proteins. *Curr. Opin. Cell Biol.* 1994;6:180–190.
- Betts MJ, Russell RB. Amino acid properties and consequences of substitutions. In *Bioinformatics for Geneticists*, M.R. Barnes, I.C. Gray eds, Wiley, 2003.
- Cagnacci A, Elliott JA, Yen SS. Melatonin: a major regulator of the circadian rhythm of core temperature in humans. *J Clin Endocrinol Metab.* 1992;75(2):447–52.
- Cassone VM. Melatonin and suprachiasmatic nucleus function. *Suprachiasmatic Nucleus: The Mind's Clock*, DC Klein, RY Moore, SM Reppert. 1991; Oxford Univ. Press, New York 309–323.
- Chan KH, Wong YH. A molecular and chemical perspective in defining MTR subtype selectivity. *Int J Mol Sci.* 2013;14(9):18385–406.
- Chai K, Liu X, Zhang Y, Lin H. Day-night and reproductive cycle profiles of melatonin receptor, kiss, and gnRH expression in orange-spotted grouper (*Epinephelus coioides*). *Mol Reprod Dev.* 2013;80(7):535–48.

613 Chaste P, Clement N, Mercati O, Guillaume JL, Delorme R, Botros HG, *et al.*  
614 Identification of pathway-biased and deleterious MTR mutants in autism spectrum  
615 disorders and in the general population. PLoS One. 2010;5(7):e11495.

616

617 Chiari Y, Cahais V, Galtier N, Delsuc F. Phylogenomic analyses support the position  
618 of turtles as the sister group of birds and crocodiles (Archosauria). BMC Biol.  
619 2012;10:65.

620

621 Choi YJ, Habibi HR, Choi CY. Profiles of gonadotropin-inhibitory hormone and  
622 melatonin during the sex change and maturation of cinnamon clownfish, *Amphiprion*  
623 *melanopus*. Biochem Biophys Res Commun. 2016;475(2):189-93.

624

625 Clement N, Renault N, Guillaume JL, Cecon E, Journé AS, Laurent X, *et al.*  
626 Importance of the second extracellular loop for melatonin MT1 receptor function and  
627 absence of melatonin binding in GPR50. Br J Pharmacol. 2017.

628

629 Confente F, Rendón M, Besseau L, Falcón J, Muñoz-Cueto JA. MTRs in a  
630 pleuronectiform species, *Solea senegalensis*: Cloning, tissue expression, day-night  
631 and seasonal variations. Gen Comp Endocrinol. 2010;167(2):202–14.

632

633 Dehal P, Boore JL. Two rounds of whole genome duplication in the ancestral  
634 vertebrate. PLoS Biol. 2005;3(10):e314.

635

636 Drummond AJ, Ho SYW, Phillips MJ, Rambaut A. Relaxed phylogenetics and dating  
637 with confidence. PLoS Biol. 2006;4(5):e88.

638

- 639 Drummond AJ, Suchard MA, Xie D, Rambaut A. Bayesian phylogenetics with BEAUti  
640 and the BEAST 1.7. *Mol. Biol. Evol.* 2012;29(8):1969–73.  
641
- 642 Dubocovich ML, Markowska M. Functional MT1 and MT2 MTRs in Mammals.  
643 *Endocrine* 2005;27(2):101–110.  
644
- 645 Dufourny L, Levasseur A, Migaud M, Callebaut I, Pontarotti P, Malpoux B, Monget P.  
646 GPR50 is the mammalian ortholog of Mel1c: Evidence of rapid evolution in  
647 mammals. *BMC Evol. Biol.* 2008;8:105.  
648
- 649 Dupuis J, Langenberg C, Prokopenko I, Saxena R, Soranzo N, Jackson AU *et al.*  
650 New genetic loci implicated in fasting glucose homeostasis and their impact on type 2  
651 diabetes risk. *Nat Genet.* 2010;42(2):105–16.  
652
- 653 Ebisawa T, Karne S, Lerner MR, Reppert SM. Expression cloning of a high-affinity  
654 MTR from *Xenopus* dermal melanophores. *Proc Natl Acad Sci U S A.*  
655 1994;91(13):6133–7.  
656
- 657 Falcón J, Besseau L, Fuentès M, Sauzet S, Magnanou E, Boeuf G. Structural and  
658 functional evolution of the pineal melatonin system in vertebrates. *Ann N Y Acad Sci.*  
659 2009;1163:101–11.  
660
- 661 Feng NY, Bass AH. "Singing" Fish Rely on Circadian Rhythm and Melatonin for the  
662 Timing of Nocturnal Courtship Vocalization. *Curr Biol.* 2016;26(19):2681–2689.  
663

664 Force A, Lynch M, Pickett FB, Amores A, Yan YL, Postlethwait J. Preservation of  
665 duplicate genes by complementary, degenerative mutations. *Genetics*.  
666 1999;151(4):1531–45.

667

668 Fujii R. The regulation of motile activity in fish chromatophores. *Pigment Cell Res*.  
669 2000;13(5):300–19.

670

671 Gaildrat P, Falcón J. Melatonin receptors in the pituitary of a teleost fish: mRNA  
672 expression, <sup>2</sup>-(125)I]iodomelatonin binding and cyclic AMP response.  
673 *Neuroendocrinology*. 2000;72(1):57–66.

674

675 Gauer F, Masson-Pévet M, Stehle J, Pévet P. Daily variations in MTR density of rat  
676 pars tuberalis and suprachiasmatic nuclei are distinctly regulated. *Brain Res*  
677 1994;641: 92–98.

678

679 Gernhard T. The conditioned reconstructed process. *J Theor Biol*. 2008;253:769–78.

680

681 Glasauer SM, Neuhauss SC. Whole-genome duplication in teleost fishes and its  
682 evolutionary consequences. *Mol Genet Genomics*. 2014;289(6):1045–60.

683

684 Gubitzi AK, Reppert SM. Chimeric and point-mutated receptors reveal that a single  
685 glycine residue in transmembrane domain 6 is critical for high affinity melatonin  
686 binding. *Endocrinology* 2000;141(3):1236–44.

687

688 Hardeland R, Cardinali DP, Srinivasan V, Spence DW, Brown GM, Pandi-Perumal  
689 SR. Melatonin--a pleiotropic, orchestrating regulator molecule. Prog Neurobiol.  
690 2011;93(3):350–84.

691

692 Hamasaki DI, Eder DJ. Adaptive Radiation of the Pineal System. *in* Handbook of  
693 sensory physiology - The Visual System in Vertebrates (F. Crescitelli, ed.), Springer-  
694 Verlag, New York 1977;7(5)497–548.

695

696 Herrera-Pérez P, Del Carmen Rendón M, Besseau L, Sauzet S, Falcón J, Muñoz-  
697 Cueto JA. MTRs in the brain of the European sea bass: An *in situ* hybridization and  
698 autoradiographic study. J Comp Neurol. 2010;518(17):3495–511.

699

700 Hoang DT, Chernomor O, von Haeseler A, Minh BQ, Vinh LS. UFBoot2: Improving  
701 the ultrafast bootstrap approximation. Mol. Biol. Evol. 2018;35:518–522.

702

703 Hong LY, Hong WS, Zhu WB, Shi Q, You XX, Chen SX. Cloning and expression of  
704 MTRs in the mudskipper *Boleophthalmus pectinirostris*: their role in synchronizing its  
705 semilunar spawning rhythm. Gen Comp Endocrinol. 2014;195:138–50.

706

707 Houston RD, Macqueen DJ. Atlantic salmon (*Salmo salar* L.) genetics in the 21st  
708 century: taking leaps forward in aquaculture and biological understanding. Anim  
709 Genet. 2019;50(1):3–14.

710

711 Ikegami T, Azuma K, Nakamura M, Suzuki N, Hattori A, Ando H. Diurnal expressions  
712 of four subtypes of MTR genes in the optic tectum and retina of goldfish. Comp  
713 Biochem Physiol A Mol Integr Physiol. 2009;152(2):219–24.

714

715 Ikegami T, Maruyama Y, Doi H, Hattori A, Ando H. Ultradian oscillation in expression  
716 of four MTR subtype genes in the pineal gland of the grass puffer, a semilunar-  
717 synchronized spawner, under constant darkness. *Front Neurosci.* 2015;9:9.

718

719 Jin YH, Park JW, Kim JH, Kwon JY. The Expression Pattern of MTR 1a Gene during  
720 Early Life Stages in the Nile tilapia (*Oreochromis niloticus*). *Dev Reprod.*  
721 2013;17(1):45–53.

722

723 Jockers R, Maurice P, Boutin JA, Delagrangé P. MTRs, heterodimerization, signal  
724 transduction and binding sites: what's new? *Br J Pharmacol.* 2008;154(6):1182–95.

725

726 Jones DT, Taylor WR, Thornton JM. The rapid generation of mutation data matrices  
727 from protein sequences. *Bioinformatics* 1992;8(3):275–282.

728

729 Kalyaanamoorthy S, Minh BQ, Wong TKF, von Haeseler A, Jermiin LS. ModelFinder:  
730 fast model selection for accurate phylogenetic estimates. *Nat Methods.*  
731 2017;14(6):587–589.

732

733 Kamesh N, Aradhyam GK, Manoj N. The repertoire of G protein-coupled receptors in  
734 the sea squirt *Ciona intestinalis*. *BMC Evol. Biol.* 2008;8:129.

735

736 Katoh K, Standley DM. MAFFT multiple sequence alignment software version 7:  
737 improvements in performance and usability. *Mol Biol Evol.* 2013;30(4):772–80.

738

- 739 Kokkola T, Foord SM, Watson MA, Vakkuri O, Laitinen JT. Important amino acids for  
740 the function of the human MT1 MTR. *Biochem Pharmacol.* 2003;65(9):1463–71.  
741
- 742 Kokkola T, Salo OM, Poso A, Laitinen JT. The functional role of cysteines adjacent to  
743 the NRY motif of the human MT1 MTR. *J Pineal Res.* 2005;39(1):1–11.  
744
- 745 Krishnan A, Almén MS, Fredriksson R, Schiöth HB. Remarkable similarities between  
746 the hemichordate (*Saccoglossus kowalevskii*) and vertebrate GPCR repertoire.  
747 *Gene.* 2013;526(2):122–33.  
748
- 749 Kuraku S. Impact of asymmetric gene repertoire between cyclostomes and  
750 gnathostomes. *Semin. Cell Dev. Biol.* 2013;24(2):119–27.  
751
- 752 Kuraku S, Meyer A, Kuratani S. Timing of Genome Duplications Relative to the Origin  
753 of the Vertebrates: Did Cyclostomes Diverge before or after? *Mol Biol Evol*  
754 2009;26(1):47–59.  
755
- 756 Lesku JA, Vyssotski AL, Martinez-Gonzalez D, Wilzeck C, Rattenborg NC. Local  
757 sleep homeostasis in the avian brain: convergence of sleep function in mammals and  
758 birds? *Proc. R. Soc. B* 2011;278:2419–2428.  
759
- 760 Levoye A, Dam J, Ayoub MA, Guillaume JL, Couturier C, Delagrangé P, Jockers R.  
761 The orphan GPR50 receptor specifically inhibits MT1 MTR function through  
762 heterodimerization. *Embo J.* 2006;25(13):3012–3023.  
763



764 Lien S, Koop BF, Sandve SR, Miller JR, Kent MP, Nome T, *et al.* The Atlantic salmon  
765 genome provides insights into rediploidization. *Nature*. 2016;12;533(7602):200–5.

766

767 Lutterschmidt DI, Lutterschmidt WI, Hutchison VH. Melatonin and thermoregulation in  
768 ectothermic vertebrates: a review. *Can. J. Zool.* 2003;81:1–13.

769

770 Macqueen DJ, Johnston IA. A well-constrained estimate for the timing of the  
771 salmonid whole genome duplication reveals major decoupling from species  
772 diversification. *Proc Biol Sci.* 2014;281(1778):20132881.

773

774 Macqueen DJ, Wilcox AH. Characterization of the definitive classical calpain family of  
775 vertebrates using phylogenetic, evolutionary and expression analyses. *Open Biol.*  
776 2014;4:130219.

777

778 Mazna P, Grycova L, Balik A, Zemkova H, Friedlova E, Obsilova V, *et al.* The role of  
779 proline residues in the structure and function of human MT2 MTR. *J Pineal Res.*  
780 2008;45(4):361–72.

781

782 Mazna P, Berka K, Jelinkova I, Balik A, Svoboda P, Obsilova V, *et al.* Ligand binding  
783 to the human MT2 MTR: the role of residues in transmembrane domains 3, 6, and 7.  
784 *Biochem Biophys Res Commun.* 2005;332(3):726–34.

785

786 Mazurais D, Brierley I, Anglade I, Drew J, Randall C, Bromage N, *et al.* Central MTRs  
787 in the rainbow trout: comparative distribution of ligand binding and gene expression.  
788 *J. Comp. Neurol.* 1999;409:313–324.

789

790 Norris DO, Carr JA. Vertebrate endocrinology. Academic Press, 2013.

791

792 Nordstrom KJ, Fredriksson R, Schioth HB. The amphioxus *Branchiostoma floridae*  
793 genome contains a highly diversified set of G protein-coupled receptors. BMC Evol.  
794 Biol. 2008;8:9.

795

796 Nguyen L-T, Schmidt HA, von Haeseler A, Minh BQ. IQ-TREE: A fast and effective  
797 stochastic algorithm for estimating maximum likelihood phylogenies. Mol. Biol. Evol.  
798 2015;32:268–274.

799

800 Nguyen NTT, Vincens P, Roest Crolius H, Louis A. Genomicus 2018: karyotype  
801 evolutionary trees and on-the-fly synteny computing. Nucleic Acids Res.  
802 2018;46(D1):D816–D822.

803

804 Ota KG, Fujimoto S, Oisi Y, Kuratani S. Identification of vertebra-like elements and  
805 their possible differentiation from sclerotomes in the hagfish. Nat Commun.  
806 2011;2:373.

807

808 Park YJ, Park JG, Takeuchi Y, Hur SP, Lee YD, Kim SJ, Takemura A. Influence of  
809 moonlight on mRNA expression patterns of MTR subtypes in the pineal organ of a  
810 tropical fish. Mar Genomics. 2014;14:67–70.

811

812 Park YJ, Park JG, Jeong HB, Takeuchi Y, Kim SJ, Lee YD, Takemura A. Expression  
813 of the MTR Mel(1c) in neural tissues of the reef fish *Siganus guttatus*. Comp  
814 Biochem Physiol A Mol Integr Physiol. 2007(a);147(1):103–11.

815

816 Park YJ, Park JG, Hiyakawa N, Lee YD, Kim SJ, Takemura A. Diurnal and circadian  
817 regulation of a MTR, MT1, in the golden rabbitfish, *Siganus guttatus*. Gen Comp  
818 Endocrinol. 2007(b);150(2):253–62.

819

820 Park YJ, Park JG, Kim SJ, Lee YD, Saydur Rahman M, Takemura A. MTR of a reef  
821 fish with lunar-related rhythmicity: cloning and daily variations. J Pineal Res.  
822 2006;41(2):166–74.

823

824 Prokopenko I., Langenberg C, Florez JC, Saxena R, Soranzo N, Thorleifsson G, *et*  
825 *al.* Variants in MTNR1B influence fasting glucose levels. Nat. Genet. 2009;41:77–81.

826

827 Redmond AK, Macqueen DJ, Dooley H. Phylotranscriptomics suggests the jawed  
828 vertebrate ancestor could generate diverse helper and regulatory T cell subsets.  
829 BMC Evol Biol. 2018;18(1):169.

830

831 Rensing L, Ruoff P. Temperature effect on entrainment, phase shifting, and  
832 amplitude of circadian clocks and its molecular bases. Chronobiol Int.  
833 2002;19(5):807–64.

834

835 Reppert SM, Weaver DR, Ebisawa T. Cloning and characterization of a mammalian  
836 MTR that mediates reproductive and circadian responses. Neuron 1994;13:1177–  
837 1185.

838

839 Reppert SM, Godson C, Mahle CD, Weaver DR, Slaugenhaupt SA, Gusella JF.  
840 Molecular characterization of a second MTR expressed in human retina and brain:  
841 the Mel1b-MTR. Proc Natl Acad Sci USA 1995(a);92:8734–8738.

842

843 Reppert SM, Weaver DR, Cassone VM, Godson C, Kolakowski LF Jr. Melatonin  
844 receptors are for the birds: molecular analysis of two receptor subtypes differentially  
845 expressed in chick brain. *Neuron* 1995(b);15:1003–1015.

846

847 Robertson FM, Gundappa MK, Grammes F, Hvidsten TR, Redmond AK, Lien S, *et*  
848 *al.* Lineage-specific rediploidization is a mechanism to explain time-lags between  
849 genome duplication and evolutionary diversification. *Genome Biol.* 2017;18(1):111.

850

851 Sauzet S, Besseau L, Herrera Perez P, Covès D, Chatain B, Peyric E, *et al.* Cloning  
852 and retinal expression of MTRs in the European sea bass, *Dicentrarchus labrax*. *Gen*  
853 *Comp Endocrinol.* 2008; 157(2):186–95.

854

855 Sethi S, Adams W, Pollock J, Witt-Enderby PA. C-terminal domains within human  
856 MT1 and MT2 MTRs are involved in internalization processes. *J Pineal Res.*  
857 2008;45(2):212–8.

858

859 Shang EH, Zhdanova IV. The circadian system is a target and modulator of prenatal  
860 cocaine effects. *PLoS One.* 2007;2(7):e587.

861

862 Shi Q, Ando H, Coon SL, Sato S, Ban M, Urano A. Embryonic and post-embryonic  
863 expression of arylalkylamine N-acetyltransferase and MTR genes in the eye and  
864 brain of chum salmon (*Oncorhynchus keta*). *Gen Comp Endocrinol.*  
865 2004;136(3):311–21.

866

- 867 Shiu SY, Ng N, Pang SF. A molecular perspective of the genetic relationships of G-  
868 protein coupled MTR subtypes. *J Pineal Res.* 1996;20(4):198–204.
- 869
- 870 Slominski RM, Reiter RJ, Schlabritz-Loutsevitch N, Ostrom RS, Slominski AT.  
871 Melatonin membrane receptors in peripheral tissues: distribution and functions. *Mol*  
872 *Cell Endocrinol.* 2012;351(2):152–66.
- 873
- 874 Solovyev V, Kosarev P, Seledsov I, Vorobyev D. Automatic annotation of eukaryotic  
875 genes, pseudogenes and promoters. *Genome Biol.* 2006;7(1):10.1–10.12.
- 876
- 877 Stadler PF, Fried C, Prohaska SJ, Bailey WJ, Misof BY, Ruddle FH, Wagner GP.  
878 Evidence for independent Hox gene duplications in the hagfish lineage: a PCR-based  
879 gene inventory of *Eptatretus stoutii*. *Mol Phylogenet Evol.* 2004;32(3):686–94.
- 880
- 881 Stoltzfus A. On the possibility of constructive neutral evolution. *J Mol Evol.*  
882 1999;49(2):169–81.
- 883
- 884 Sugahara F, Murakami Y, Adachi N, Kuratani S. Evolution of the regionalization and  
885 patterning of the vertebrate telencephalon: what can we learn from cyclostomes?  
886 *Curr. Opin. Genet. Dev.* 2013;23:475–83.
- 887
- 888 Talavera G, Castresana J. Improvement of phylogenies after removing divergent and  
889 ambiguously aligned blocks from protein sequence alignments. *Syst Biol.*  
890 2007;56(4):564–77.
- 891

892 Trifinopoulos J, Nguyen LT, von Haeseler A, Minh BQ. W-IQ-TREE: a fast online  
893 phylogenetic tool for maximum likelihood analysis. *Nucleic Acids Res.*  
894 2016;44(W1):W232–5.

895

896 Underwood H, Edmonds K. The circadian rhythm of thermoregulation in Japanese  
897 quail: III. Effects of melatonin administration. *J Biol Rhythms.* 1995;10(4):284–98.

898

899 Vernadakis AJ, Bemis WE, Bittman EL. Localization and partial characterization of  
900 MTRs in amphioxus, hagfish, lamprey, and skate. *Gen Comp Endocrinol.*  
901 1998;110(1):67–78.

902

903 Vilella AJ, Severin J, Ureta-Vidal A, Heng L, Durbin R, Birney E. EnsemblCompara  
904 GeneTrees: Complete, duplication-aware phylogenetic trees in vertebrates. *Genome*  
905 *Res.* 2009;19(2):327–35.

906

907 Viswanathan M, Laitinen JT, Saavedra JM. Expression of MTRs in arteries involved  
908 in thermoregulation. *Proc Natl Acad Sci USA* 1990;87:6200–6203.

909

910 Weaver DR, Reppert SM. Melatonin receptors are present in the ferret pars tuberalis  
911 and pars distalis, but not in brain. *Endocrinology.* 1990;127(5):2607–9.

912

913 Witt-Enderby PA, Bennett J, Jarzynka MJ, Firestine S, Melan MA. MTRs and their  
914 regulation: biochemical and structural mechanisms. *Life Sciences* 2003;72:2183–  
915 2198.

916

917 ZFIN, <https://zfin.org>.



919

## FIGURE LEGENDS

920

921 **Fig. 1.** Bayesian phylogenetic tree of MTR family evolution in jawed vertebrates. The  
922 analysis was done using BEAST with a high-confidence alignment of eighty MTRs  
923 (300 amino acid positions; Additional Dataset 1), an uncorrelated relaxed molecular  
924 clock model and the best-fitting amino acid substitution model (JTT+F+I+G4).  
925 Numbers on branches are posterior probability support. Three WGD events in  
926 vertebrate evolution are shown (2R - ancestral to vertebrates; Ts3R - ancestral to  
927 teleosts; Ss4R - ancestral to salmonids). A ML tree was performed using the same  
928 data and is provided in Fig. S1.

929

930 **Fig. 2.** Proposed evolutionary history of each MTR family member, considering (a)  
931 Mel1d, (b) MT1, (c) MT2m, and (d) Mel1c. Species inferred to have lost all copies of  
932 a MTR gene are highlighted in dark red. Teleost species inferred to have lost  
933 paralogues of MTR genes arising from the Ts3R and Ss4R events are highlighted in  
934 light red.

935

936 **Fig. 3.** Conserved synteny between the genomic neighbourhood containing MTR  
937 orthologues of different lineages, shown for (a) jawed vertebrate MT1, (b) jawed  
938 vertebrate Mel1d, (c) jawed vertebrate MT2, (d) jawed vertebrate Mel1c, (e)  
939 comparing MTR from two lamprey species with jawed vertebrates, and (f) comparing  
940 a urochordate with vertebrates.

941

942 **Fig. 4.** Conserved synteny between the genomic neighbourhood containing MTR  
943 paralogues retained from Ts3R and Ss4R, shown for (a) MT1a, (b) MT1b, (c) Mel1d,  
944 (d) MT2a, (e) MT2b, and (f) Mel1c.



945

946 **Fig. 5.** ML phylogenetic analysis of FAT atypical protocadherins in jawed vertebrates.

947 The analysis was done using IQ-TREE with a high-confidence alignment of thirty-five  
948 FAT proteins (2,540 amino acid positions; Additional Dataset 2) and the best-fitting  
949 amino acid substitution model (JTT+G+I). Numbers on branches are bootstrap  
950 support values. Other details are as in the Fig. 1 legend.

951

952 **Fig. 6.** Alignment used to compare amino acid positions among vertebrate MTR

953 proteins (matching to the alignment used for phylogenetic analysis; Additional  
954 Dataset S1). Species abbreviations: Ac = *Anolis carolensis* (green anole lizard); Am  
955 = *Astyanax mexicanus* (Mexican cavefish); Bt = *Bos taurus* (cattle); Cm =  
956 *Callorhynchus milli* (elephant shark); Dr = *Danio rerio* (zebrafish); El = *Esox lucius*  
957 (northern pike); Gg = *Gallus gallus* (chicken); Hs = *Homo sapiens* (human); Lc =  
958 *Latimeria chalumnae* (coelacanth); Lo = *Lepisosteus oculatus* (spotted gar); Oa =  
959 *Ornithorhynchus anatinus* (platypus); On = *Oreochromis niloticus* (Nile tilapia); Ps =  
960 *Pelodiscus sinensis* (Chinese softshell turtle); Tr = *Takifugu rubripes* (tiger pufferfish);  
961 Xt = *Xenopus tropicalis* (western clawed frog). Detailed annotation of sequences  
962 flagged up in the main text are provided within the figure.

963

964 **Table 1.** Phylogenetic assignment of teleost MTRs to a standardized nomenclature  
965 system.

966

967

| Species |                                                                        | Receptors (names attributed in the literature) and orthology group assignment from this study |                              |                                                         |                                                 |                                             | References                                    |                                                                                                                                           |
|---------|------------------------------------------------------------------------|-----------------------------------------------------------------------------------------------|------------------------------|---------------------------------------------------------|-------------------------------------------------|---------------------------------------------|-----------------------------------------------|-------------------------------------------------------------------------------------------------------------------------------------------|
|         |                                                                        | MT1                                                                                           |                              | MT2                                                     |                                                 | Mel1c                                       |                                               | Mel1d                                                                                                                                     |
|         |                                                                        | MT1a                                                                                          | MT1b                         | MT2a                                                    | MT2b                                            |                                             |                                               |                                                                                                                                           |
| Dr      | <i>Danio rerio</i><br>(zebrafish)                                      | Z1.7<br>(U31822.1)                                                                            |                              |                                                         | Z2.6<br>(U31824.1)                              |                                             | Z1.4<br>(U31823.1)                            | Reppert <i>et al.</i><br>1995(b)                                                                                                          |
|         |                                                                        | zMel1a1,<br>Z1.7-4,<br>mtnr1aa<br>(NM_131393.1)                                               | zMel1a3<br>(XM_6889<br>89.6) | zMel1b2, Z6.2,<br>Mel1b-19,<br>mtnr1ba<br>(NM_131395.1) | zMel1b1,<br>Z2.6-4,<br>mtnr1bb<br>(NM_131394.1) | zMel1c, Z2.3,<br>mtnr1c<br>(NM_001161484.1) | zMel1a2, Z1.4,<br>mtnr1al<br>(NM_001159909.1) | Shang &<br>Zhdanova<br>2007                                                                                                               |
| Om      | <i>Oncorhynchus mykiss</i><br>(rainbow trout)                          | R1.7<br>(AF156262.1)<br>= MT1a2                                                               |                              |                                                         |                                                 |                                             | R1.4<br>(AF178538.1)                          | Mazurais <i>et al.</i><br>1999<br><b>!!!!!! N.B.:<br/>the R2.6 gene<br/>(AF178929.1)<br/>is a chimera<br/>between Mel1d<br/>and MT2b2</b> |
| EI      | <i>Esox lucius</i><br>(northern pike)                                  |                                                                                               |                              | P2.6<br>(AF188871.1)                                    |                                                 |                                             | P1.4<br>(XM_010903666.1)                      | Gaidrat and<br>Falcón, 2000                                                                                                               |
| Oke     | <i>Oncorhynchus keta</i><br>(chum salmon)                              | mel1a<br>(AY356364.1)<br>= MT1a2                                                              |                              |                                                         |                                                 |                                             | mel1b<br>(AY356365.1)                         | Shi <i>et al.</i> 2004                                                                                                                    |
| Sg      | <i>Siganus guttatus</i><br>(golden rabbitfish)                         | Mel1a<br>(DQ768087.1)                                                                         |                              |                                                         |                                                 | Mel1c<br>(DQ768088.1)                       | Mel1b<br>(DQ522314.1)                         | Park <i>et al.</i> ,<br>2006, 2007a,b,<br>2014                                                                                            |
| Ca      | <i>Carassius auratus</i><br>(goldfish)                                 | Mel1a1.7<br>(AB378058.1)                                                                      |                              |                                                         | Mel1b<br>(AB378059.1)                           | Mel1c<br>(AB378060.1)                       | Mel1a1.4<br>(AB378057.1)                      | Ikegami <i>et al.</i><br>2009                                                                                                             |
|         |                                                                        | G1.7<br>(AB481372.1)                                                                          |                              | G6.2<br>(AB481374.1)                                    | G2.6 type1<br>(AB481373.1)                      | Mel1c<br>(AB481375.1)                       | G1.4<br>(AB481371.1)                          | Saito,<br>unpublished                                                                                                                     |
| DI      | <i>Dicentrarchus labrax</i><br>(sea bass)                              | dIMT1<br>(EU378918.1)                                                                         |                              |                                                         | dIMT2<br>(EU378919.1)                           | dIMel1c<br>(EU378920.1)                     |                                               | Sauzet <i>et al.</i> ,<br>2008<br>Herrera-Pérez<br>P <i>et al.</i> , 2010                                                                 |
| Sse     | <i>Solea senegalensis</i><br>(Senegal sole)                            |                                                                                               |                              |                                                         | ssMT2<br>(FM213464.1)                           | ssMel1c<br>(FM213465.1)                     | ssMT1<br>(FM213463.1)                         | Confente <i>et al.</i><br>2010                                                                                                            |
| On      | <i>Oreochromis niloticus</i><br>(Nile tilapia)                         | mel1a<br>(AY569971.1)                                                                         |                              |                                                         |                                                 |                                             |                                               | Jin <i>et al.</i> , 2013                                                                                                                  |
| Ec      | <i>Epinephelus coioides</i><br>(orange-spotted grouper)                | MT1<br>(JX524508.1)                                                                           |                              |                                                         | MT2<br>(JX524509.1)                             |                                             |                                               | Chai <i>et al.</i> ,<br>2013                                                                                                              |
| Bp      | <i>Boleophthalmus pectinirostris</i><br>(mudskipper)                   | Mtnr1a1.7<br>(KC622030.1)                                                                     |                              |                                                         | Mtnr1b<br>(KC622031.1)                          | Mtnr1c<br>(KC622032.1)                      | Mtnr1a1.4<br>(KC622029.1)                     | Hong <i>et al.</i><br>2014                                                                                                                |
| Tn      | <i>Takifugu niphobles</i><br>(grass puffer)                            | mel1a1.7<br>(AB492764.1)                                                                      |                              |                                                         | mel1b<br>(AB492765.1)                           | mel1c<br>(AB492766.1)                       | mel1a1.4<br>(AB492763.1)                      | Ikegami <i>et al.</i><br>2015                                                                                                             |
| Pn      | <i>Porichthys notatus</i><br>(plainfin midshipman -<br>"singing" fish) | mtnr1A1.7<br>(HQ007044)                                                                       |                              | Mel1b<br>(KT878765.1)                                   |                                                 |                                             | mtnr1a1.4<br>(HQ007045)                       | Feng & Bass,<br>2016,<br>Feng<br>unpublished                                                                                              |
| Amel    | <i>Amphiprion melanopus</i><br>(cinnamon clownfish)                    | MT-R1<br>(HM107821.1)                                                                         |                              |                                                         |                                                 |                                             |                                               | Choi <i>et al.</i> ,<br>2016                                                                                                              |

*Notes: Phylogenetic assignment according to findings of this study; previous publications using distinct nomenclature systems are provided. Sequences in red signal a significant change in assignment.*

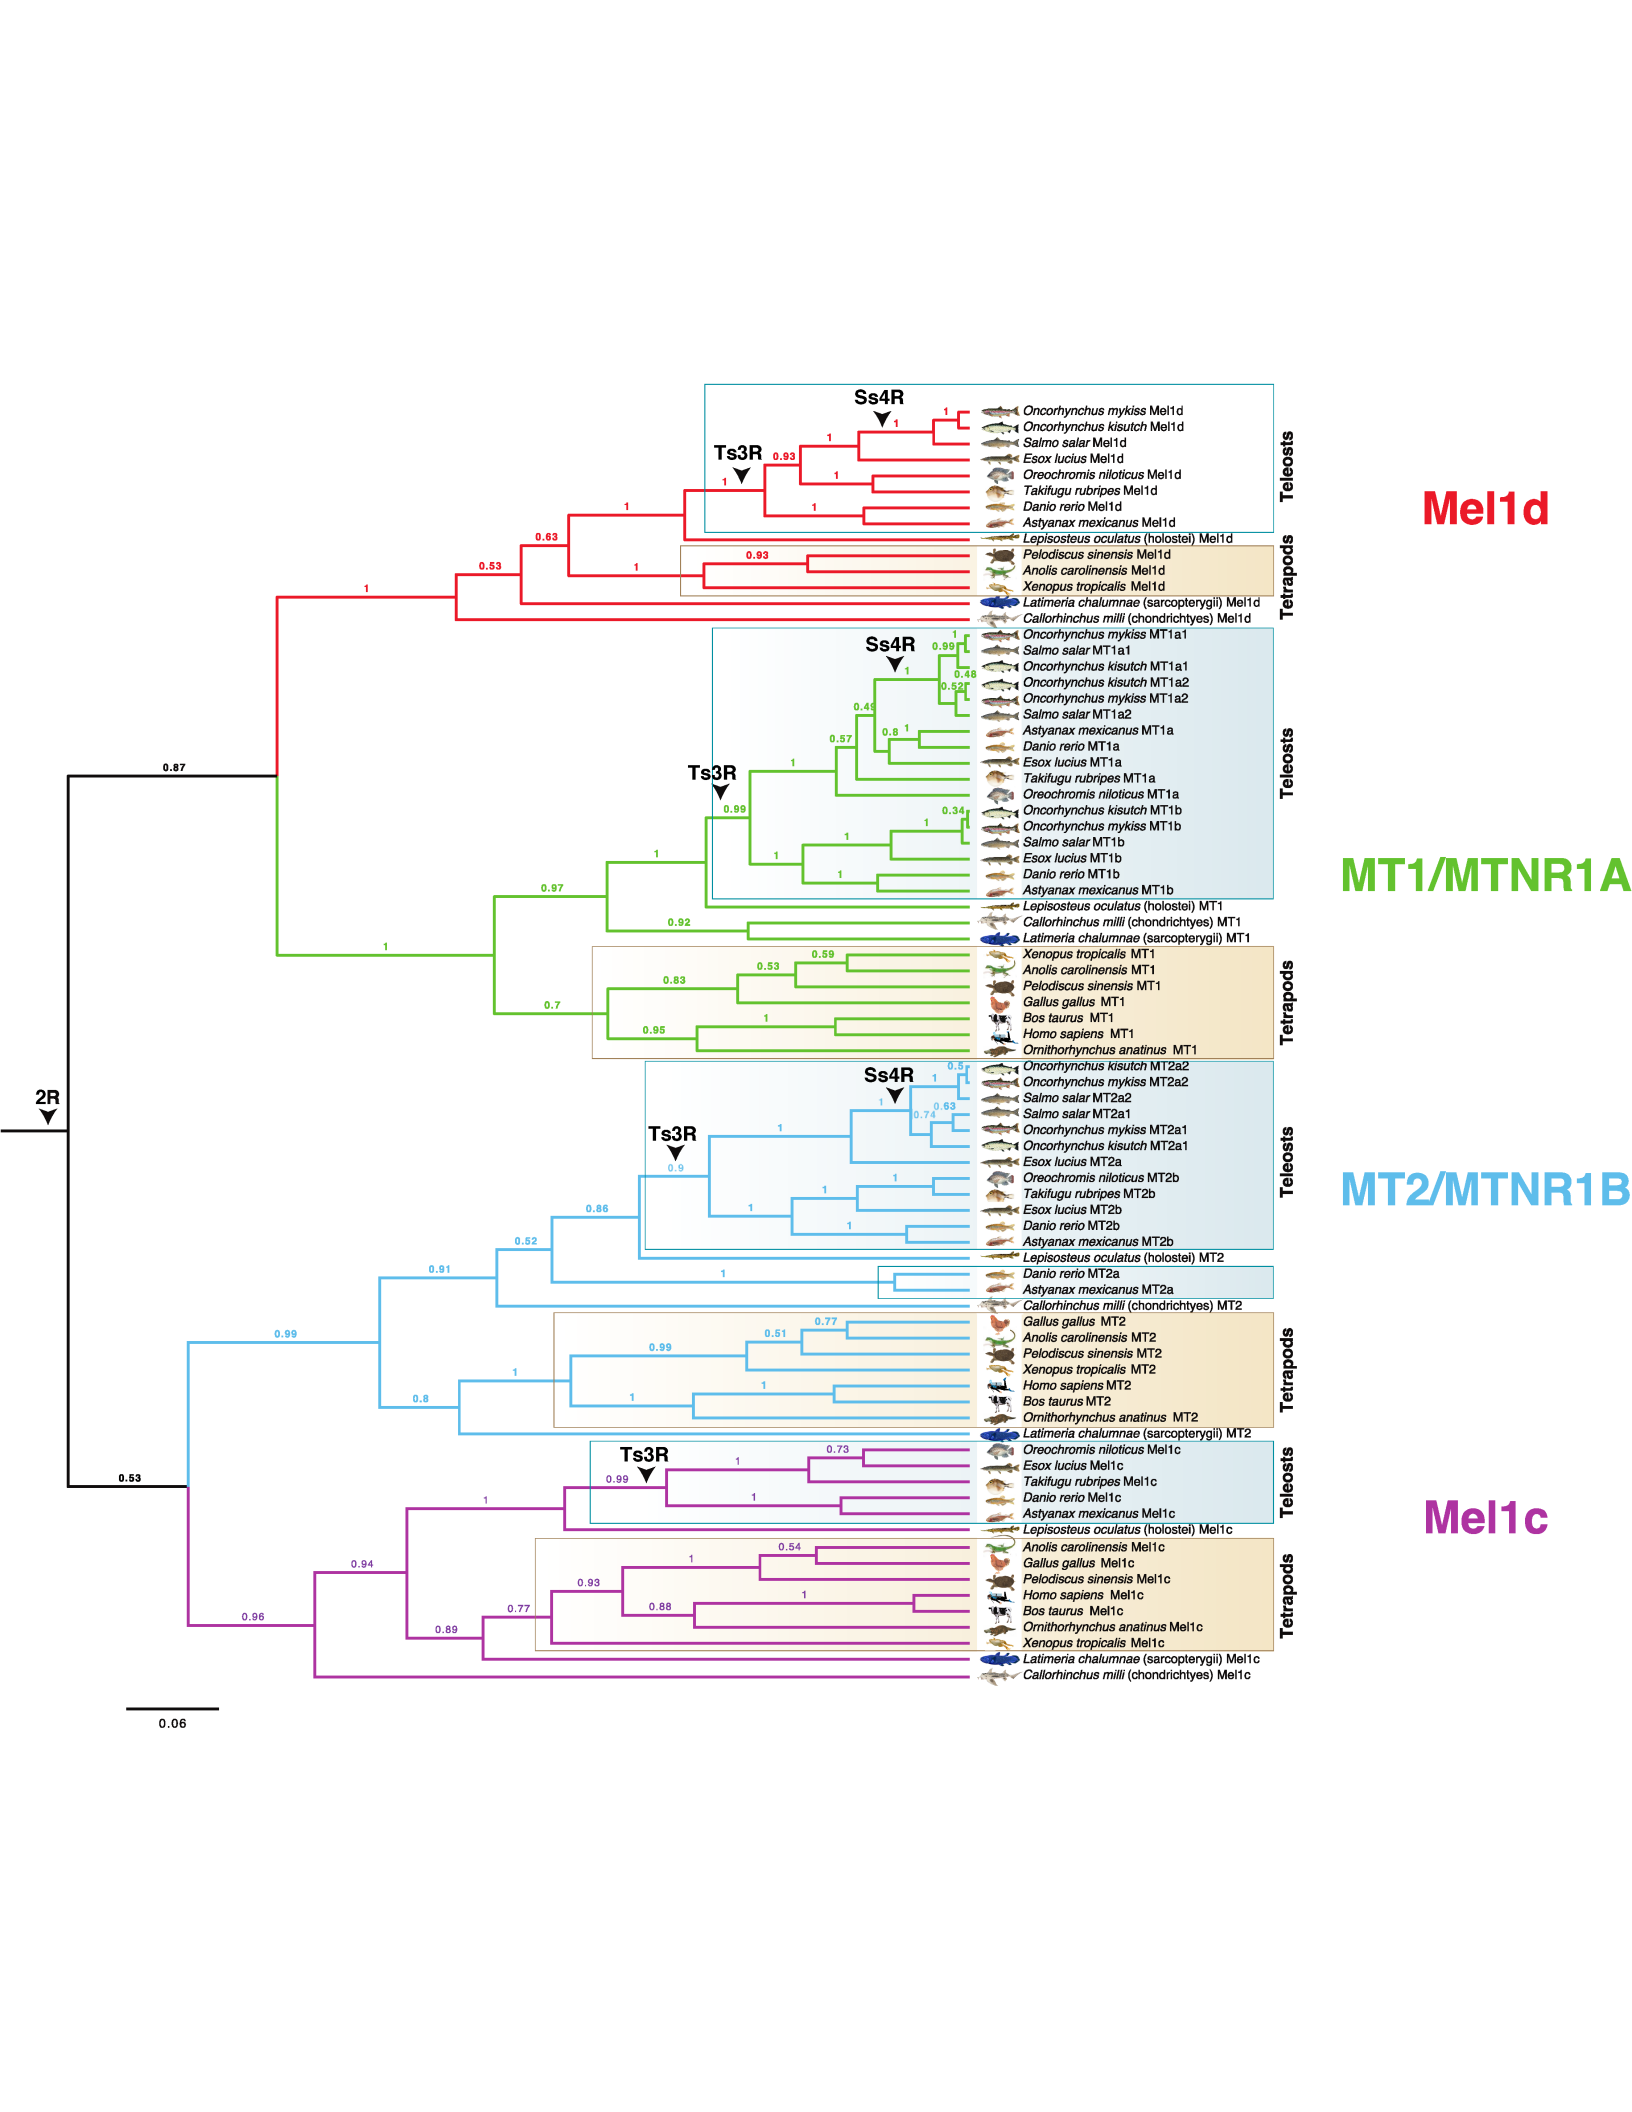

### a. Mel1d

Number of copies

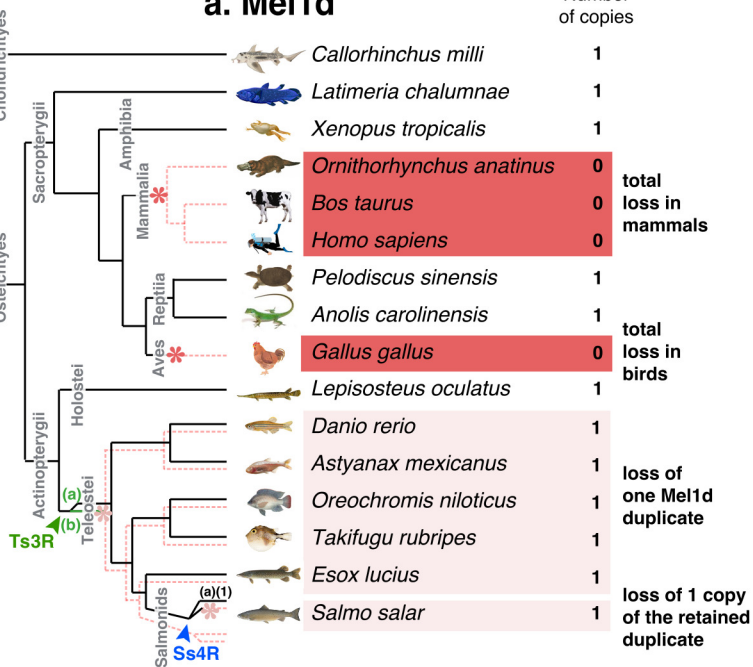

### b. MT1 (MTNR1A)

Number of copies

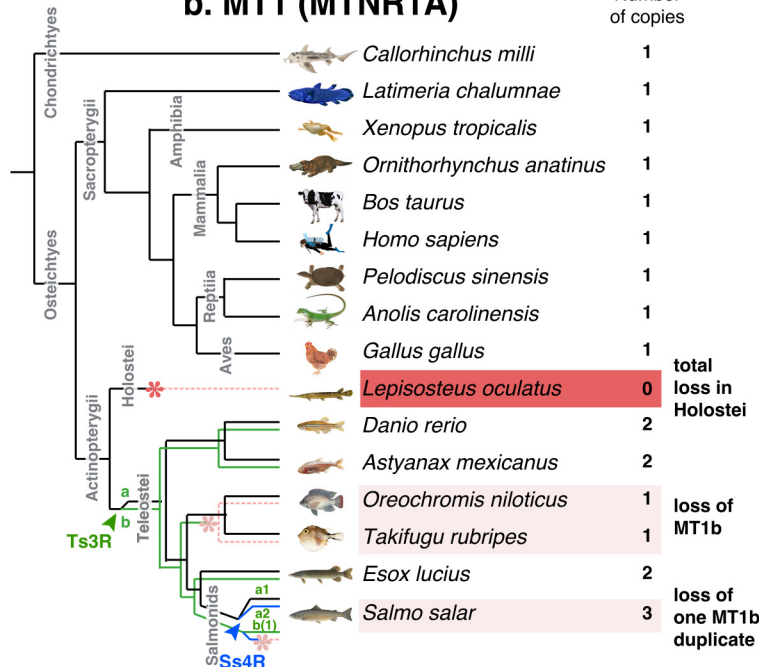

### c. MT2 (MTNR1B)

Number of copies

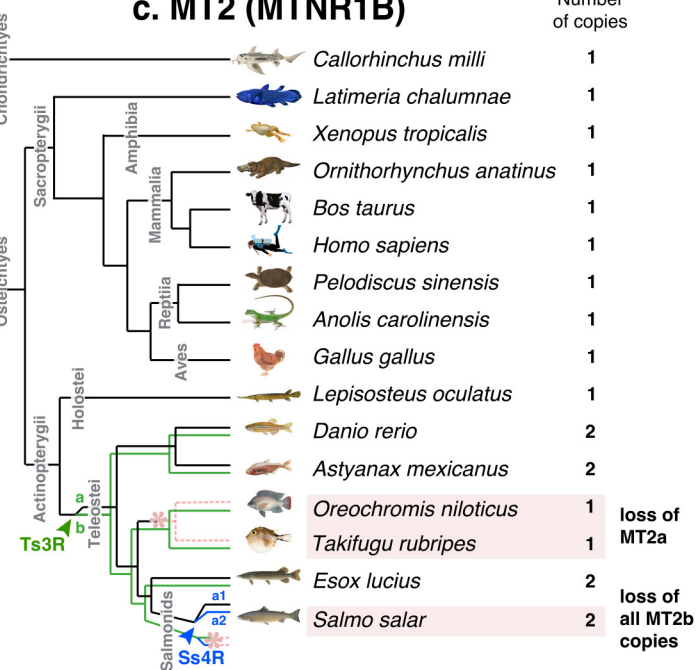

### d. Mel1c

Number of copies

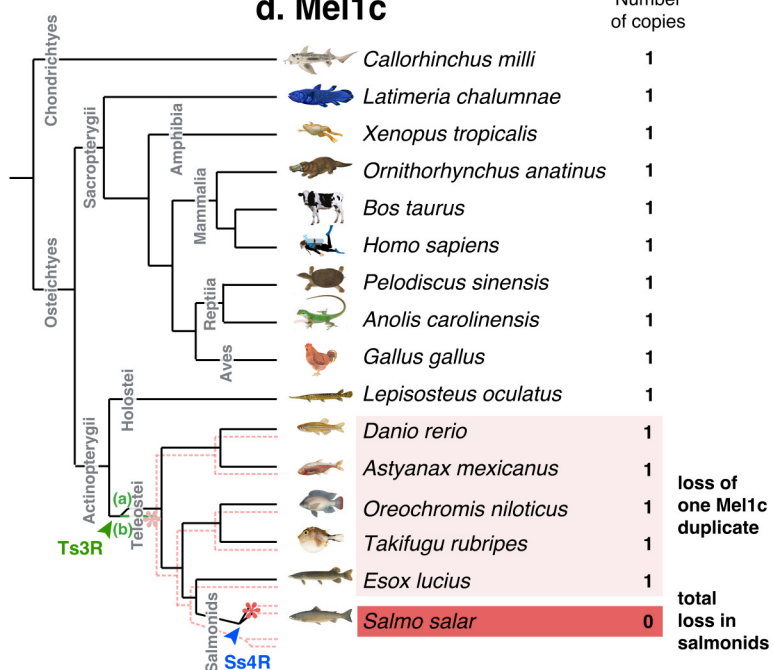

▲ Whole genome duplication \* Reduction in copy number \* Loss of all copies

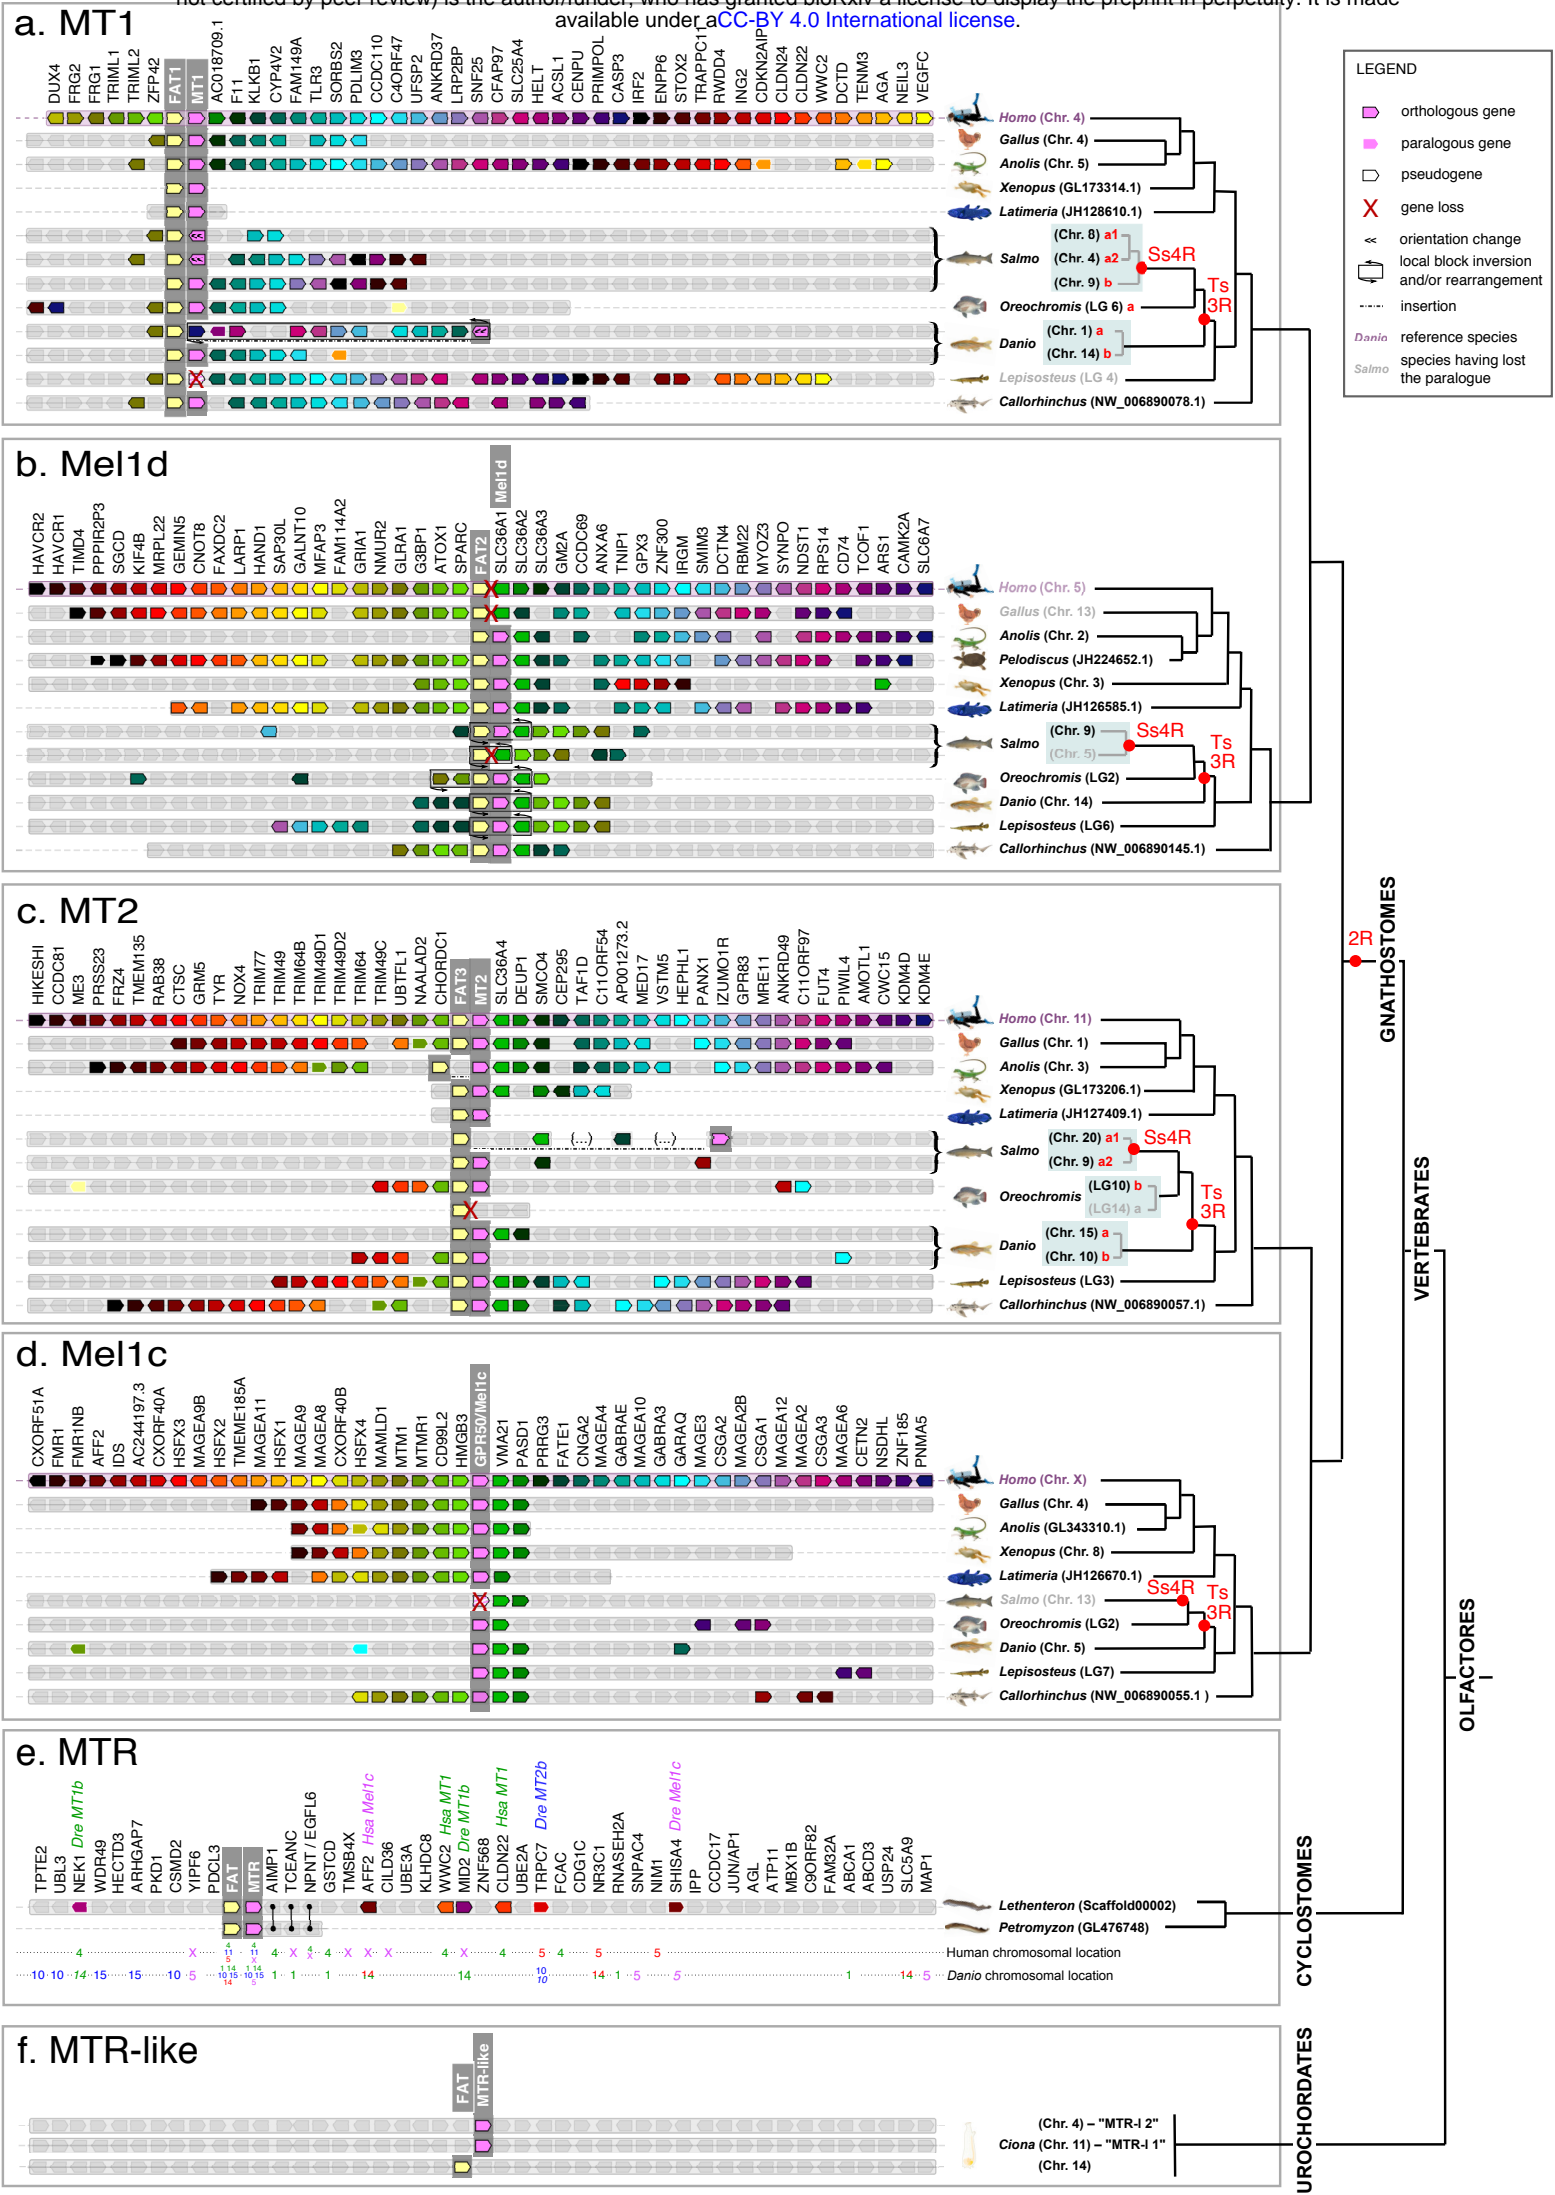

### a. MT1a

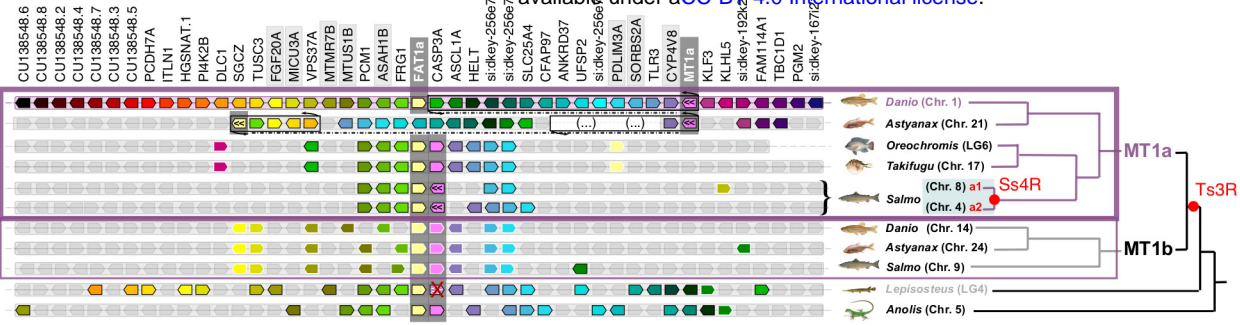

### b. MT1b

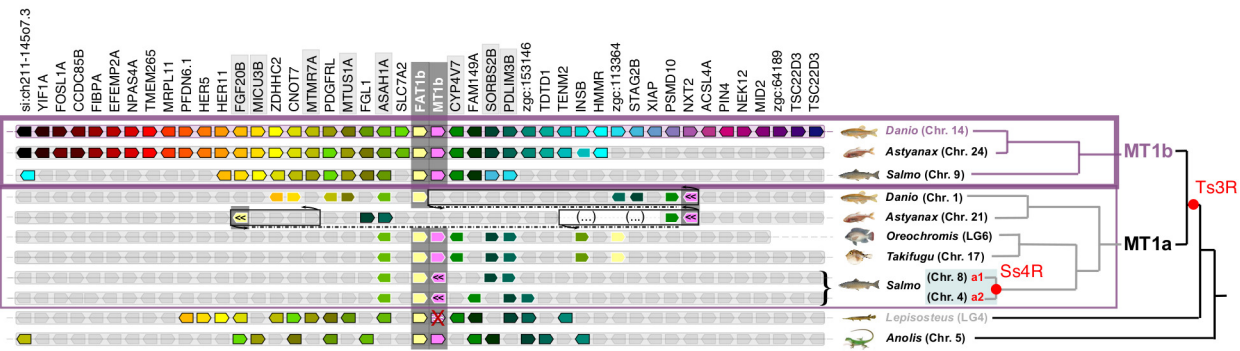

### c. Mel1d

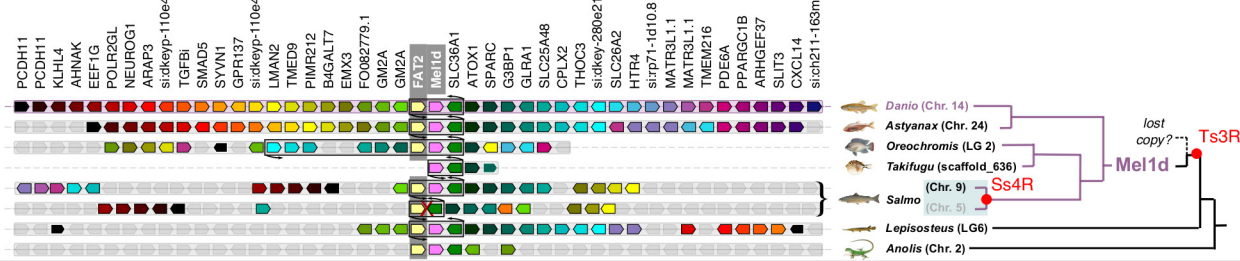

### d. MT2a

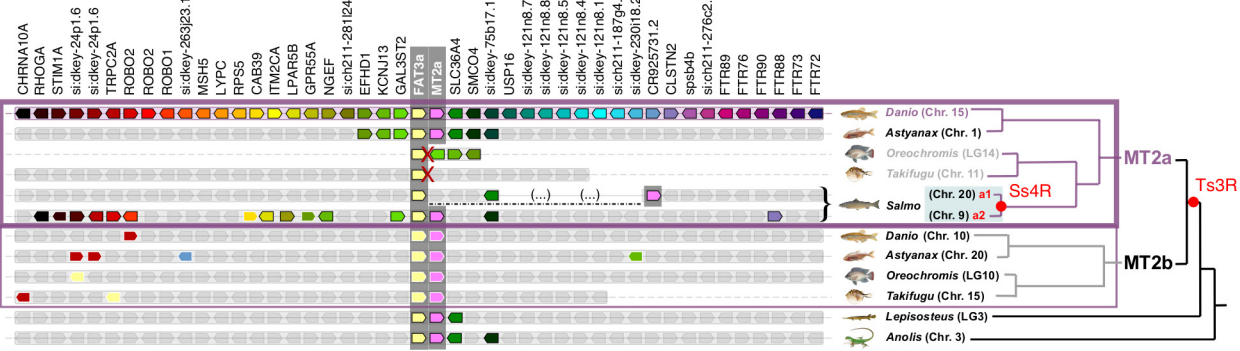

### e. MT2b

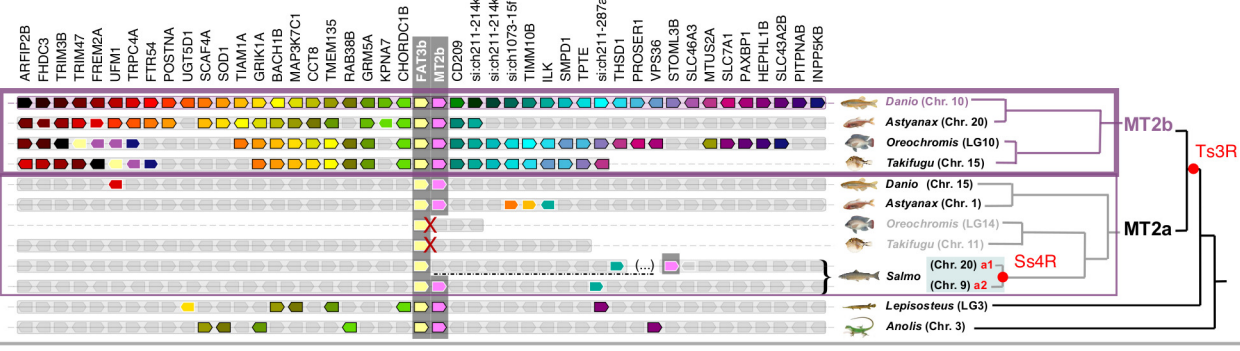

### f. Mel1c

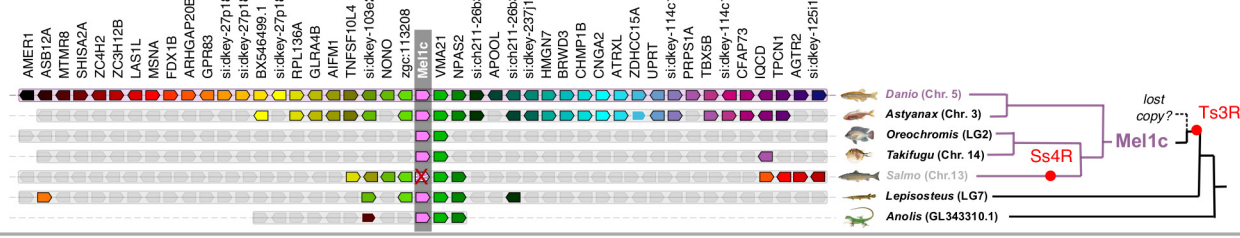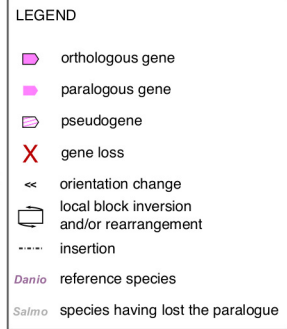





Mutations affecting the function of the Me12d  
 Mutations affecting the function of the Me11d

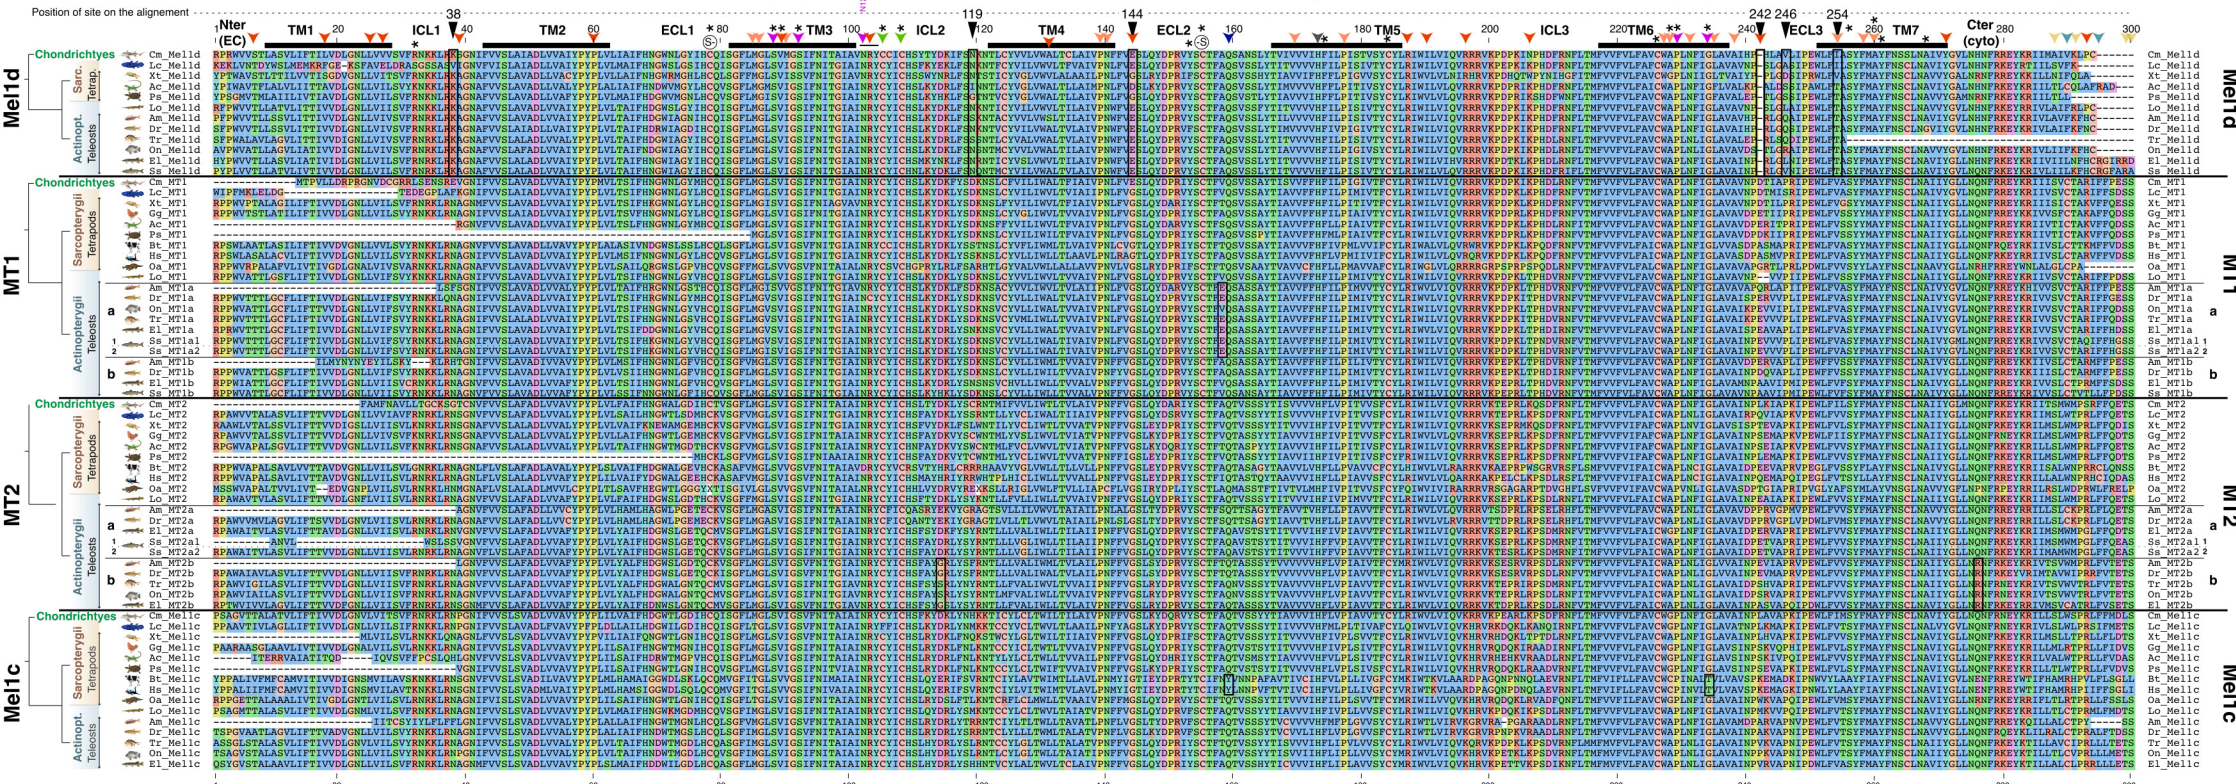

**Amino acid properties**

- Basic (positive) : K, R
- Acidic (negative) : D, E
- Hydrophobic unchanged : A, F, I, L, M, V, W
- Polar uncharged : N, Q, S, T
- Very small, non polar : s, u
- Very small, non polar : s, u
- Aromatic : H, Y
- Iminocid : P

**Particular sites**

- TM** Transmembrane domain
- ICL** Intracellular loop
- ECL** Extracellular loop
- Highlighted sequence difference
- Known site for disulfide bond
- Significant sequence difference between Me1d and the other receptors
- Important residue for ligand binding in all GPCRs (Chan & Wong 2013)
- Important residue for MT2 ligand binding (Mazza et al. 2005, 2008, Chan & Wong 2013)
- Important residue for MT1 G protein activation and trafficking (Kokkola et al. 2005)
- Potential palmitoylation sites (anchoring and signaling) (Sethi et al. 2008)
- Potential phosphorylation sites (internalization) (Sethi et al. 2008)
- Human mutations affecting MT1 or MT2 receptor function (Chaste et al. 2010; Bonnefond et al. 2012)
- Mutation in GPR56 found only in eutherian mammals (Clément et al. 2017)
